# Supplementary material for: Quantification of CH 4 coal mining emissions in Upper Silesia by passive airborne remote sensing observations with the MAMAP instrument during CoMet
Source: Copernicus journal article supplement (doi:10.5194/acp-2020-1014), 2021-01-08
Supplement: Supplementary file [file acp-2020-1014-AC1-supplement.pdf]

### Reviewer #3 (R#3):

**First of all, we would like to thank the anonymous reviewer for the detailed and helpful comments. In the following, we first state the comment of the reviewer (R#3-X) and then give our response. References to the manuscript are related to the original discussion manuscript: e.g., P2L30 → page 2, line 30.**

The authors describe the methods and the results of methane emissions measurements from coal mines in the Upper Silesian Coal Basin in Poland. The paper provides a detailed description of measurement methods used and results of emissions measurement. The study is well-designed, and the paper is deserved to be published in Atmospheric Chemistry and Physics.

**Please see our detailed response as given below.**

R#3-1) The authors should better describe the key findings of the study. The article provides a lot of technical detail and, as a result, the reader cannot see the “forest” behind the “trees.” The authors provide too many peculiarities, so the article could benefit from adding general conclusions about methane emissions in the basin. The article is quite long, so part of the technical material can be moved to a supplement.

**We agree with the reviewer that some parts of the manuscript might be too detailed. Therefore, we went thoroughly through each chapter trying to identify the peculiarities and shortened or removed paragraphs where appropriate. Some technical details were additionally moved to the Appendix. This applies in particular to the abstract and the Sects. ‘Method and data’ and ‘Discussion’. For details, see the difference document.**

**In order to provide a sound comparison between measured emissions and emission inventories, we think, it is also important elaborate on details of the used technique. Some of those are instrument specific (e.g., concentration measurements by MAMAP), however others, such as deriving a reliable wind estimate, turbulence in the atmosphere and/or minimizing errors, are more widely applicable and therefore also useful for other readers.**

**As we focus on small clusters of ventilation shafts and investigated only around 40% of all shafts in that area, we cannot derive conclusions for the entire basin, e.g., that emission inventories generally over- or underestimate the coal mining emissions in that area. This was done by e.g., Fiehn et al., 2020, using airborne in-situ observations, and is mentioned in the manuscript. However, because we used remote sensing observations, we were able to fly closer to the ventilation shafts separating them and having a closer look at single or small groups of shafts (as discussed on P21L457ff). See comment R#3-3 for further details.**

**Although the entire article (including the Appendix) comprises 39 pages, we prefer to have the technical details and additional figures, which are included in the Appendix, directly in the document of the main article and not in a Supplement, which would be a separate file. The reader should have direct access to retrieval details or additional figures without needing to look it up in another file. However, should the editor or typesetters prefer to see this information published in a supplement rather than an appendix, this can be done.**

R#3-2) It would be great to have some information about coal production in the Upper Silesian Coal Basin. What is the annual coal production? What is the rank of the coal? What is the methane content of the coal? How do the mines report emissions?

**We agree and think this would indeed be some valuable background information for the interested reader. We added a short paragraph to the introductory part.**

R#3-3) P4/L6f: The key novelty of the article is the comparison of measured data with emission inventories. What can be done to improve the accuracy of emission inventories? How the result of the study can help?

**As described in R#3-1, general conclusions about the emissions over the entire basin cannot be derived. However, in this study we had the luck to have emission data with hourly resolution directly measured within the shafts – at least for a limited number of mines/shafts. They show a high variability of the emissions during the time of the campaign, which has to be considered if the accuracy of the emission inventories should be improved by independent top-down approaches. This is not only valid for the USCB but also for other regions if emissions are highly variable. In the manuscript, we therefore concluded, that “As a result, observed fluxes could substantially deviate from reported annual values. Therefore, comparison of CH<sub>4</sub> fluxes derived from different types of observations requires simultaneous data acquisition. Additionally, observed fluxes should only be compared to hourly data to capture the variability correctly. This emphasizes the need for hourly inventories of anthropogenic emissions to improve top-down and bottom-up comparisons.” (P23L525ff)**

**Furthermore, the derived fluxes and the hourly emission data agree within their uncertainties. To further refine emissions estimates and their source positions, and to also identify interfering unknown sources, denser observation patterns are needed. This can only be achieved by imaging remote-sensing instruments with high spatial resolution (P23L532ff). This also responds to the argument that multiple overflights over one source are needed to average over the atmospheric turbulence (P23L516f).**

# Quantification of CH<sub>4</sub> coal mining emissions in Upper Silesia by passive airborne remote sensing observations with the MAMAP instrument during CoMet

Sven Krautwurst<sup>1</sup>, Konstantin Gerilowski<sup>1</sup>, Jakob Borchardt<sup>1</sup>, Norman Wildmann<sup>2</sup>, Michal Galkowski<sup>3,6</sup>, Justyna Swolkien<sup>4</sup>, Julia Marshall<sup>3</sup>, Alina Fiehn<sup>2</sup>, Anke Roiger<sup>2</sup>, Thomas Ruhtz<sup>5</sup>, Christoph Gerbig<sup>3</sup>, Jaroslaw Necki<sup>6</sup>, John P. Burrows<sup>1</sup>, Andreas Fix<sup>2</sup>, and Heinrich Bovensmann<sup>1</sup>

<sup>1</sup>Institute of Environmental Physics (IUP), University of Bremen, Bremen, Germany

<sup>2</sup>Deutsches Zentrum für Luft- und Raumfahrt (DLR), Institut für Physik der Atmosphäre, Oberpfaffenhofen, Germany

<sup>3</sup>Department Biogeochemical Signals, Max Planck Institute for Biogeochemistry, Jena, Germany

<sup>4</sup>Faculty of Mining and Geoengineering, AGH University of Science and Technology, Krakow, Poland

<sup>5</sup>Institute for Space Sciences, Free University of Berlin, Berlin, Germany

<sup>6</sup>Faculty of Physics and Applied Computer Science, AGH University of Science and Technology, Krakow, Poland

**Correspondence:** Sven Krautwurst (krautwurst@iup.physik.uni-bremen.de)

## Abstract.

Methane (CH<sub>4</sub>) is the second most important anthropogenic greenhouse gas, whose atmospheric concentration is modulated by human-induced activities, and it has a larger global warming potential than carbon dioxide (CO<sub>2</sub>). Because of its short atmospheric lifetime relative to that of CO<sub>2</sub>, the reduction of the atmospheric abundance of CH<sub>4</sub> is an attractive target for short term climate mitigation strategies. However, reducing the atmospheric CH<sub>4</sub> concentration requires a reduction of its emissions and, therefore, knowledge of its sources **is essential**.

For this reason, the CO<sub>2</sub> and Methane (CoMet) campaign in ~~early summer of May and June~~ 2018 ~~was initiated with the primary goal of assessing~~ assessed emissions of one of the largest CH<sub>4</sub> emission hot spots in Europe, the Upper Silesian Coal Basin (USCB) in southern Poland, using top-down approaches and inventory data. ~~In this campaign, a variety of instruments (both in situ and remote sensing) and platforms (e.g., ground-based and airborne) were deployed, which were supplemented by modeling activities supporting the flight planning and the interpretation of the observations. Consequently, emissions originating from ~54 coal mine ventilation shafts distributed over an area of around 60 × 40 could be investigated on different scales, ranging from single shafts over smaller clusters up to the entire basin.~~

~~In this~~ In this study, we will focus on CH<sub>4</sub> column anomalies retrieved from spectral radiance observations, which were acquired by the 1D nadir-looking passive remote sensing Methane Airborne MAPper (MAMAP) instrument, using the Weighting Function Modified Differential Optical Absorption Spectroscopy (WFM-DOAS) method. The column anomalies ~~are~~ are combined with wind lidar measurements ~~and~~ are inverted to cross-sectional fluxes ~~for different flight tracks making use of using~~ a mass balance approach. ~~These fluxes are subsequently used to assess the~~ With the help of these fluxes, reported emissions of small clusters of ~~ventilation shafts~~ coal mine ventilation shafts are then assessed.

20 The MAMAP CH<sub>4</sub> column observations ~~allow for~~ enable an accurate assignment of observed fluxes to small clusters of ventilation shafts. CH<sub>4</sub> fluxes are estimated for 4 clusters ~~comprising with a total of 23 ventilation shafts in total,~~ which are responsible for about 40 % of the total CH<sub>4</sub> ~~emissions from mining~~ mining emissions in the target area. The observations ~~used~~ were made during ~~multiple~~ several overflights on different days ~~between 28 May and 7 June 2018.~~ The final averaged . The final average CH<sub>4</sub> fluxes for the single clusters (or sub-clusters) range from about 1 to 9 t CH<sub>4</sub> hr<sup>-1</sup> at the time of  
25 the campaign. The ~~range of~~ fluxes observed at one cluster during different overflights ~~can~~ vary by as much as 50 % of the ~~respective averaged~~ average value. Associated errors (1-σ) are usually between 15 % and 59 % of the ~~averaged flux,~~ mainly ~~depending~~ average flux, depending mainly on the prevailing wind conditions, the number of flight tracks, and the magnitude of the flux itself. Comparison to known hourly emissions, where available, shows good agreement ~~with the computed fluxes~~ within the uncertainties. ~~In the case that only annually reported emissions~~ If only emissions reported annually are available for  
30 comparison with the observations, caution is ~~required due to potential fluctuations of the emissions during one~~ advised due to possible fluctuations in emissions during a year or even within hours. To measure emissions even more precisely and to ~~further~~ ~~unravel them~~ break them down further for allocation to individual shafts in a complex source region ~~as encountered in such as~~ the USCB, imaging remote sensing instruments are recommended.

*Copyright statement.* BY COPERNICUS

## 35 1 Introduction

The release of greenhouse gases from anthropogenic activity significantly influences the atmospheric surface temperature ~~and the Earth's climate~~ (Stocker et al., 2013). Consequently, ~~there is a well recognized~~ the need to reduce these emissions is well recognized (Fesenfeld et al., 2018; UNFCCC, 2015, 1998). The ~~largest impact on the surface temperature results from the~~ increase in carbon dioxide (CO<sub>2</sub>) ~~;~~ which exerts induces the largest impact on the surface temperature with a radiative forcing  
40 (RF) of ~1.8 W m<sup>-2</sup> (Etminan et al., 2016). ~~The second most important man-made increase in~~ The second largest increase in anthropogenic radiative forcing results from the increase in methane (CH<sub>4</sub>) with ~0.6 W m<sup>-2</sup> (Etminan et al., 2016). However, on a per mass basis, CH<sub>4</sub> is 34 times more efficient in trapping heat in the Earth's atmosphere over 100 years than CO<sub>2</sub> (Myhre et al., 2013, including climate-carbon feedbacks). Moving to shorter time scales (e.g., 20 years), the effectiveness (or the global warming potential, GWP) of CH<sub>4</sub> rises to 86 times that of CO<sub>2</sub> (Myhre et al., 2013, including climate-carbon feedbacks). The  
45 ~~relatively~~ high GWP of CH<sub>4</sub> in combination with a ~~relatively~~ short atmospheric lifetime of around 9 years (Prather et al., 2012) makes CH<sub>4</sub> an attractive target for short term emission reduction and, thus, climate mitigation strategies (Saunio et al., 2016; Shindell et al., 2012).

To reduce methane emissions, their emission strengths and also locations need to be known. However, current knowledge is inadequate as evidenced by the discussion about the origin of increasing atmospheric CH<sub>4</sub> concentrations observed since  
50 2007 (Dlugokencky et al., 2011). Depending on the applied methodology (e.g., measuring ethane-to-methane ratio or isotopic

analysis), authors either conclude that CH<sub>4</sub> emissions from fossil fuels (Franco et al., 2016; Hausmann et al., 2016; Helmig et al., 2016; Turner et al., 2016) or from wetlands and agriculture (Nisbet et al., 2016; Schaefer et al., 2016; Schwietzke et al., 2016) have increased or that the increase in atmospheric CH<sub>4</sub> is even related to a decline in atmospheric OH, which removes the CH<sub>4</sub> (Rigby et al., 2017; Turner et al., 2017). Interestingly, even though Schwietzke et al. (2016) concluded that the increase is mostly related to wetlands and agriculture, they further stated that global emissions from the fossil fuel industry could be ~40 % higher than previously expected by Saunio et al. (2016). A study by Petrenko et al. (2017) supports this hypothesis and finds indications that even this revised number might be too low by at least 25 %. A recent study from Jackson et al. (2020) also concluded that the global increase in atmospheric CH<sub>4</sub> has been mostly driven by anthropogenic emissions and natural CH<sub>4</sub> emissions remained almost unaltered between the period 2000–2006 and 2017. However, not only globally, but also on smaller scales our knowledge and characterization of fossil fuel CH<sub>4</sub> emissions is inadequate (e.g., Buchwitz et al., 2017; Maasackers et al., 2016; Alexe et al., 2015; Turner et al., 2015).

A large source of anthropogenically emitted CH<sub>4</sub> originates from coal mining. It globally accounts for around one-tenth of the anthropogenic CH<sub>4</sub> emissions of about 350 Mt CH<sub>4</sub> yr<sup>-1</sup> (Saunio et al., 2016, 2020). China, the largest emitter of CH<sub>4</sub> from coal mining, is responsible for ~50 % of the global total (EPA, 2012). The share of the European Union is around 4 %, with the largest contribution originating from Poland. This country is also home to the largest contemporary hard coal mining area in Europe, located in the Upper Silesian Coal Basin (USCB), occupying around 7400 km<sup>2</sup> (Gzyl et al., 2017) in total, and extending into the Czech Republic (compare to Fig. 1, area in Poland is around 5400 km<sup>2</sup>).

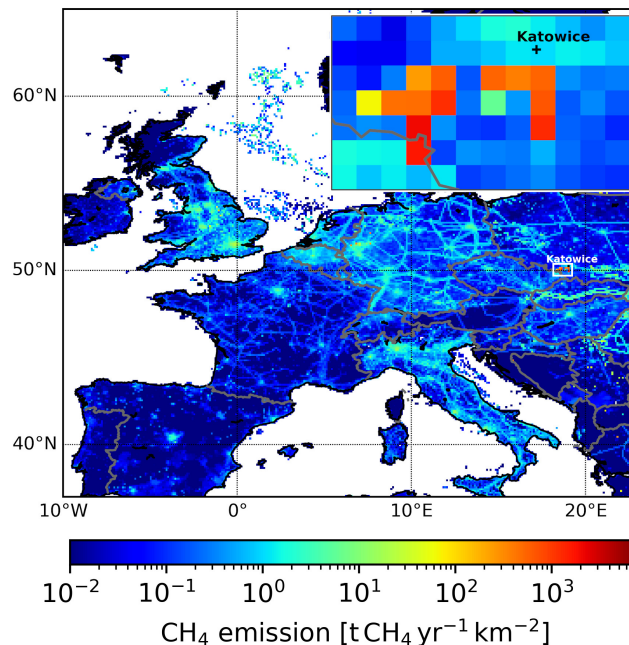

**Figure 1.** European CH<sub>4</sub> emissions from fossil fuels in 2016. The Upper Silesian Coal Basin (USCB) is located at around 19° E and 50° N framed by the white rectangle. A magnification is shown in the inset. Emission map is based on data from Scarpelli et al. (2020).

According to the latest bottom-up inventories (i.e. emissions calculated from emission factors and activity data), the EDGAR v4.3.2<sup>1</sup> inventory for 2012 (Janssens-Maenhout et al., 2019) and v5.0<sup>2</sup> for 2015 (Crippa et al., 2020), and an inventory specially designed for fossil fuel emissions from Scarpelli et al. (2020) for 2016, annual fossil fuel CH<sub>4</sub> emissions range from about 550 to 820 kt CH<sub>4</sub> yr<sup>-1</sup> (or 63 to 94 t CH<sub>4</sub> hr<sup>-1</sup>) in that region. The largest contribution is attributed to coal mining activities, depending on the inventory between 87 % (Crippa et al., 2020) and 99 % (Scarpelli et al., 2020). The geological structure of the deposit located in the USCB region favours gas migration. The methane content in the USCB deposits is highly diversified and increases with depth. It changes even throughout the coal mine. In the USCB mining areas, it can change between 4 to even above 16 m<sup>3</sup> t<sup>-1</sup> daf (dry ash free). The potential to generate methane from 1 t of extracted coal is described as a specific methane emission, which for the USCB Polish coal deposits reached 14.4 m<sup>3</sup> t<sup>-1</sup> in 2018. The coal output was equal to 63.4 Mt yr<sup>-1</sup> in 2018. Detailed information about variability of methane emissions and the measurement procedure will be subject of another study in the CoMet special issue (Swolkien et al., 2021).

~~To investigate this European emission hot spot, the~~ The Carbon dioxide and Methane (CoMet) campaign was performed in May and June 2018. 2018. To investigate this European CH<sub>4</sub> emission hot spot. One of its main goals was the estimation of CH<sub>4</sub> emissions from coal mining by using ~~a top-down approach and assess approaches and assessing~~ the available inventory data. ~~Additionally, the synergistic value of having both airborne passive and active remote sensing instruments was intended to be investigated.~~ In this study, we investigate the emissions emission estimates from observations made by the airborne passive remote sensing instrument MAMAP (Methane Airborne MAPper, Gerilowski et al., 2011), and wind lidar observations, for different groups of ventilation shafts. ~~In terms of spatial scales, the resulting fluxes can be classified between the~~ This study covers spatial scales in between those of already published analyses from ~~this campaign, and characterize emissions from the basin further~~ the campaign. Nickl et al. (2020) performed model simulations and ~~Fiehn et al. (2020) computed fluxes from airborne in situ observations for the entire basin, whereas Luther et al. (2019) estimated emissions from several individual shafts by means of mobile on ground FTS (Fourier Transform Spectrometer) observations. Further studies including the synergistic use of instruments and models are planned as part of the special issue "CoMet: a mission to improve our understanding and to better quantify the carbon dioxide and methane cycles".~~

This manuscript is organized as follows. Section 2 introduces the ~~applied methods~~ methods applied. This comprises a ~~more~~ comprehensive description of the CoMet campaign including the instrumentation (Sect. 2.1), ~~how~~ the passive remote sensing (Sect. 2.2.1) and ~~the~~ wind lidar (Sect. 2.2.2) observations ~~are processed and used to compute, and the computation of~~ cross-sectional fluxes (Sect. 2.2.3). Those fluxes are ~~then~~ assigned to different mining clusters in Sect. 2.3 and Sect. 2.4 describes the inventory used for comparison. In section 3 the results are presented, including the general wind situation on the different flight days (Sect. 3.1) and the computed fluxes for the different mining clusters (Sect. 3.2). Section 4 provides a ~~more~~ detailed comparison and discussion on the computed fluxes and reported CH<sub>4</sub> emissions. Finally, the results are discussed in Sect. 5 and conclusions are drawn in Sect. 6.

<sup>1</sup>available at <http://edgar.jrc.ec.europa.eu/overview.php?v=432&SECURE=123>, last access: 27.05.2020, DOI: [https://data.europa.eu/doi/10.2904/JRC\\_DATASET\\_EDGAR](https://data.europa.eu/doi/10.2904/JRC_DATASET_EDGAR)

<sup>2</sup>available at [https://edgar.jrc.ec.europa.eu/overview.php?v=50\\_GHG](https://edgar.jrc.ec.europa.eu/overview.php?v=50_GHG), last access: 27.05.2020, DOI: [https://data.europa.eu/doi/10.2904/JRC\\_DATASET\\_EDGAR](https://data.europa.eu/doi/10.2904/JRC_DATASET_EDGAR)

~~The activities and set-up of the CoMet campaign are described below. This comprises an overview of the target area, the investigated coal mine ventilation shaft complex, and the deployed instrumentation. A more detailed description of the airborne passive remote sensing instrument MAMAP and the wind lidar stations are provided. The retrieval algorithm(s) and the method used to determine the cross-sectional fluxes, including expected errors are presented. Finally, the investigated ventilation shafts are specified and the used emissions inventory for comparison is introduced.~~

## 2.1 CoMet measurement campaign and instrumentation

The CoMet research campaign ~~took place~~ in early Summer 2018 ~~with one of its goals being the investigation of~~ investigated, among other things, coal mining emissions from the largest European CH<sub>4</sub> emission hot spot, the USCB (between ~18.3° – 19.2° E and ~49.9° – 50.3° N) in Poland. CH<sub>4</sub> is emitted ~~by from~~ over 50 coal mine ventilation shafts ~~in that area occupying~~ occupying an area of around 60 × 40 km<sup>2</sup>. However, common inventories (Crippa et al., 2020; Janssens-Maenhout et al., 2019; Scarpelli et al., 2020) provide CH<sub>4</sub> emissions only at a coarse spatial resolution of 0.1° × 0.1° (translating to ~7 × 11 km<sup>2</sup> in the discussed area). Consequently, for optimal flight planning and also subsequent assignment of observed CH<sub>4</sub> enhancements to specific CH<sub>4</sub> sources, the CoMet team generated a more detailed point source inventory. This inventory, hereafter referred to as ~~CoMetv3~~ CoMet ED (emission database) v4 (Gałkowski et al., 2021) and described in further detail in Sect. 2.4, comprises ~~annually reported CH<sub>4</sub> emissions of about 530 kt CH<sub>4</sub> yr<sup>-1</sup> for 2018, which are assigned to 54 exactly geolocated active ventilation shafts found in the region.~~ ~~Figure 2 shows the area and the ventilation shafts under consideration.~~ (Figure 2)

To investigate ~~these the~~ CH<sub>4</sub> emissions on different scales ranging from single shafts over smaller clusters up to the entire basin, a variety of observation platforms and instruments were deployed ~~in the USCB during May and June in 2018. The two key instruments were the~~ during the CoMet campaign. This study focuses on observations from the airborne passive remote sensing instrument MAMAP (operated by the University of Bremen, Gerilowski et al., 2011) ~~and the airborne active remote sensing instrument CHARM-F (CO<sub>2</sub> and CH<sub>4</sub> Remote Monitoring – Flugzeug, Amediek et al., 2017; Fix et al., 2015; Quatrevalet et al., 2018), installed aboard a Cessna aircraft operated by the FUB (Freie Universitaet Berlin) and a Gulfstream G550 (HALO, High Altitude and Long Range Research Aircraft) operated by DLR, respectively. Due to its long range capabilities, the HALO aircraft operated out of Oberpfaffenhofen (EDMO), Germany, whereas the FUB Cessna was deployed at the Katowice airport (EPKT), Poland, located at the northern edge of the mining area (compare to see Fig. 2). Additional observations comprised airborne in situ concentrations. The analysis and interpretation of the MAMAP data was supported by in situ concentration measurements of CH<sub>4</sub> and CO<sub>2</sub> by the FUB Cessna, by the HALO aircraft a Gulfstream G550 (HALO, High Altitude and Long Range Research Aircraft), and by a second Cessna Caravan (also operated by the DLR, Kostinek et al., 2019). The airborne observations were complemented by on-ground measurements of in situ concentrations of and by mobile vans (operated by AGH Krakow, IUP Heidelberg, and Utrecht University as part of the MEMO2<sup>3</sup> activities), stationary and mobile column observations by FTS (operated by DLR, Luther et al., 2018), and (also operated by the DLR, Fiehn et al., 2020; Kostinek et al., 2019). Additionally, wind field observations by three sta-~~

<sup>3</sup>MEthane goes MObile – MEasurements and MOdelling; further details at [https://www.memozero.eu/](#), last access: 21.07.2020

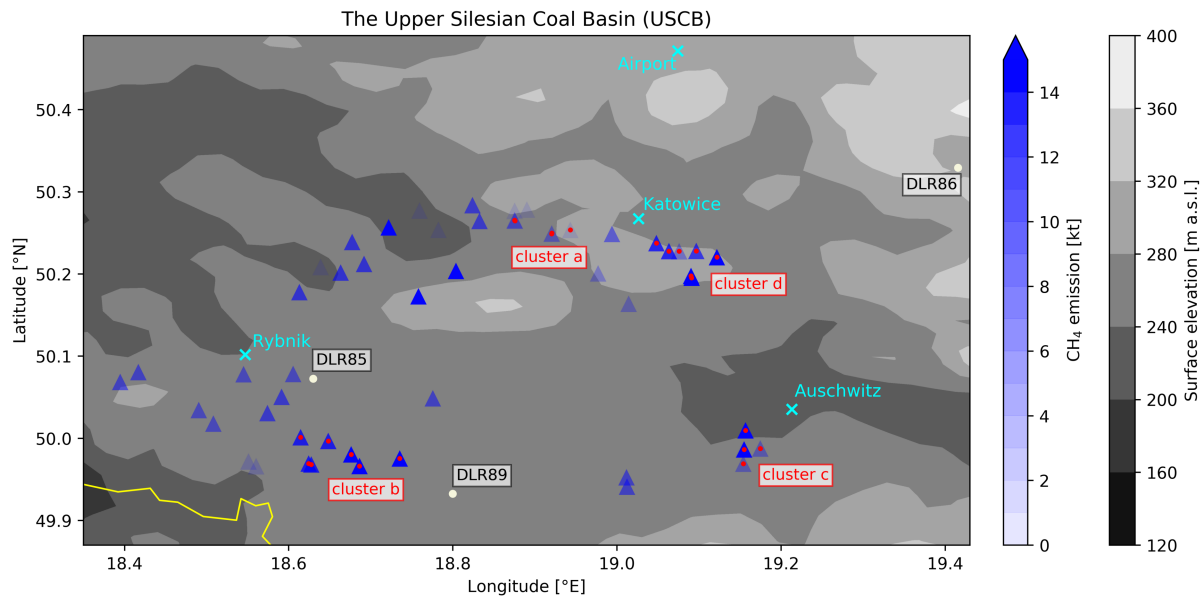

**Figure 2.** Overview of the active coal ~~mining-mine~~ ventilation shafts in the Upper Silesian Coal Basin (USCB, blueish triangles). Colour intensity indicates the annual CH<sub>4</sub> emission as stated in the ~~CoMetv3-CoMet ED v4~~ inventory for the year 2018. Ventilation shafts filled with a red circle are investigated in this work and grouped in four clusters (see main text and Table 1 for details). Filled white circles give the locations of the three wind lidars deployed during the CoMet campaign (DLR85: 50.07025° N, 18.6298° E, at 250 m a.s.l.; DLR86: 50.3292° N, 19.4155° E, at 300 m a.s.l.; DLR89: 49.9326° N, 18.7998° E, at 270 m a.s.l.). The airport is located north of the mining region. The grey ~~shaded area in the background shading~~ indicates the terrain ~~height~~ and the border to the Czech Republic is represented by the yellow solid line.

tionary wind lidars in that region specifically deployed for CoMet (~~operated by DLR, ?~~) were acquired (~~operated by DLR, Wildmann et al., 2020~~). For adequate flight planning and also interpretation of the collected data sets, various model support and weather forecast systems were provided (~~Nickl et al., 2020, Galkowski et al., in prep~~)(Galkowski et al., 2021; Nickl et al., 2020).

135 ~~While those results are subject to other papers either published or in preparation, the focus~~ The main aim of the study in hand is ~~to estimate the the estimation of the~~ small scale CH<sub>4</sub> emissions ~~of from~~ clusters of ventilation shafts by combining ~~column observations from the passive remote sensing MAMAP instrument and wind observations from the three wind lidar stations~~ MAMAP observations with wind lidar data. MAMAP is a grating spectrometer, which records ~~back-scattered-reflected~~ solar radiation from the ground while flying above the planetary boundary layer (PBL) ~~in which the emission plumes are~~   
 140 ~~located at around 3 km above ground level (a.g.l.)~~. Spectra are recorded in the shortwave infrared (SWIR) region between 1590 and 1690 nm with a spectral resolution (full width at half maximum, FWHM) of around 0.9 nm. ~~The ground scene size of one MAMAP pixel is around 90 × 100 m<sup>2</sup> (across × along track) at a flight altitude of around ~3 km a.g.l., a ground speed of ~200 km hr<sup>-1</sup>, and a total integration time of ~1s.~~ Column information of CH<sub>4</sub> is ~~then~~ extracted using absorption spectroscopy. The retrieved CH<sub>4</sub> column anomalies have a single-measurement precision of better than 0.4% relative to the background



145 column. They have, for instance, been used to estimate CH<sub>4</sub> emissions from two coal mine ventilation shafts near Ibbenbueren, Germany (Krings et al., 2013) and from landfills in Los Angeles, USA (Krautwurst et al., 2017). ~~The precision of the instrument is therefore sufficient to investigate emissions in the more complex region of the USCB. This was also investigated by means of~~ According to Observation System Simulation Experiments (OSSEs; for details, see e.g. Krautwurst et al., 2017; Gerilowski et al., 2015) performed before the campaign, which ~~simulate observed~~ considered the instrumental characteristics, the MAMAP measurement precision should be sufficient to investigate CH<sub>4</sub> ~~column anomalies based on expected emissions under various wind conditions and also considering instrumental characteristics as e.g. the measurement precision.~~ emissions in the more complex region of the USCB.

The wind information required for the flux estimates is derived from the three wind lidar systems (Leosphere Windcube 200S), which were deployed at three different locations in the USCB as shown in Fig. 2. They measure the vertically resolved wind field profile at the location of the wind lidar. Data are available as ~~30-minute~~ 30-minute averages in 50 m altitude bins. Additionally, the eddy dissipation rate is computed, from which we estimated the boundary layer height ~~is estimated~~. The uncertainty of the wind speed is ~~given with~~ 0.2 m s<sup>-1</sup> (Luther et al., 2019). Further details on the measurement principle and analysis are found in Luther et al. (2019), Stephan et al. (2018a, b), Smalikho and Banakh (2017), and Smalikho (2003).

MAMAP observations were acquired during six flights in the USCB between 28 May and 7 June mostly before or around noon. Usual flight duration over the mining area was two to three hours each. Wind lidar observations were continuously collected throughout the entire campaign period.

## 2.2 Retrieval of column anomalies and inversion to emissions

~~The following sections introduce the applied algorithm to extract the desired column information from the measured MAMAP spectra, how these columns are inverted to cross-sectional fluxes, and how the wind, which is needed for any flux estimate, is computed. Additionally, potential error sources of the column anomalies, the wind, and the final cross-sectional fluxes are presented.~~

### 2.2.1 CH<sub>4</sub> column anomalies

During a measurement flight, the MAMAP instrument typically probes the air column below the aircraft while flying above the PBL downwind of potential emission sources. The ~~spectra collected in this way~~ collected spectra contain the absorption features of CH<sub>4</sub> (and also CO<sub>2</sub>), whose strengths depend on the amount of those gases in the atmosphere. From these features, the CH<sub>4</sub> column anomalies are retrieved using the Weighting Function Modified Differential Optical Absorption Spectroscopy (WFM-DOAS) algorithm and the CH<sub>4</sub> over CO<sub>2</sub> proxy method, which are described in detail in Krings et al. (2011) and in Sect. A1.1.

On average, the accuracy and precision of the retrieved CH<sub>4</sub> column anomalies are estimated to be around 0.10 % and 0.22 %, respectively, relative to the CH<sub>4</sub> background column for this investigated data set. The single-measurement precision is directly computed from the scatter of the measured data after applying the retrieval described in Sect. A1.1 ~~and analyzing only from~~ observations which are not influenced by a CH<sub>4</sub> plume. The accuracy considers the influence of the terrain, such as

surface elevation and surface spectral reflectance, ~~on the retrieved column anomalies~~, which might not be entirely accounted for during the retrieval process. A more detailed discussion of the error budget is given in Sect. A1.2.

## 180 2.2.2 Wind information

To describe the mass flow through a cross-section of column measurements, not only trace gas anomalies, but also wind information, are required. Ideally, the wind field is measured inside or near the emission plume simultaneously to the trace gas observations. ~~This can be achieved for airborne in situ measurements, if the aircraft is equipped with the adequate instrumentation. In this case, trace gas and wind information are directly measured along the flight track while crossing the plume (e.g., ?Pitt et al., 2019; Ren et al., 2019; Peischl et al., 2018; Gordon et al., 2015). Since the MAMAP instrument needs to fly above the PBL, alternative sampling strategies for the wind field have been investigated in the past. This included, for instance, utilizing 3D wind fields from numerical weather prediction models (Krings et al., 2011), or splitting the measurement flight into two parts, where during the first part the trace gas column observations are collected by the remote sensing instrumentation flying above the PBL, and during the second part the wind information is collected within the PBL inside and outside of the plume (Krautwurst et al., 2017).~~

190 ~~For the~~ In the current study, ~~observations from the~~ we have used observations from three wind lidar stations ~~are used~~ deployed in the area of interest to estimate the prevailing ~~winds at the location and time of the MAMAP measurement, because they are available during all six flights.~~ wind conditions inside the PBL. As an example, Fig. 3 shows the temporal evolution of the wind speed at all three stations on 7 June. ~~The locations of lidar stations are included in Fig. 2.~~

195 The wind speed and direction for ~~one flight track, or one flux estimate,~~ each flight track are computed as (time and distance) weighted-averages ~~from all three stations, whereby only of all three lidar stations, only considering~~ measurements within the PBL (Fig. 3, dashed black line) ~~are considered.~~ We assume that the plume is well-mixed within, and also confined by, the PBL. ~~The vertical, coloured, dotted lines mark the overflight times of the single tracks on that day. For the desired mean wind~~ For each wind lidar, all wind speed and direction ~~, all measurements within the PBL are averaged~~ vertically for each time step and ~~then~~ the two measurements closest in time to the overflight ~~time are are averaged,~~ weighted according to their time difference to the overflight time. Finally, the values from the three stations are averaged, weighted by their distance to the flight track. ~~A similar approach has also been chosen by Luther et al. (2019).~~ This wind speed and direction ~~are value is~~ then used in the cross-sectional flux calculation described in the next section. As measure ~~for of~~ the wind error, the  $1-\sigma$  standard deviation ~~over all values as used in the average is utilized~~ considers all values used for the average to also take into account the uncertainty ~~caused by the variability~~ in the wind field over the basin and in time. Furthermore, this approach also covers vertical ~~variations due to a possible gradients due to~~ wind shear or vertically unevenly distributed ~~emissions plumes.~~ This leads in general to errors of  $\sim 1 \text{ m s}^{-1}$  and  $\sim 10^\circ$  for wind speed and direction, respectively, which exceed the measurement uncertainty of the observations ( $0.2 \text{ m s}^{-1}$ , Sect. 2.1) significantly. Additionally, a comparison between one of the wind lidar instruments and ultrasonic anemometers indicate biases of smaller than  $0.5 \text{ m s}^{-1}$  and of around  $10^\circ$  for wind speed and direction, respectively ~~(?)~~ (Wildmann et al., 2020). We assume that these errors are covered by our uncertainty computation because it is estimated from the standard deviation of observations from all three wind lidars, in most cases.

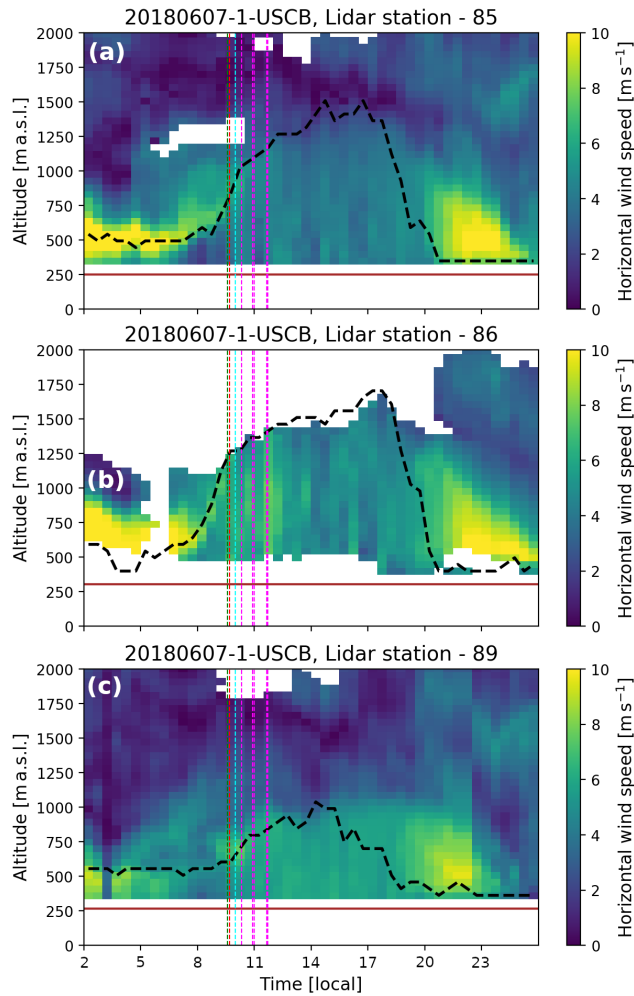

**Figure 3.** Vertically resolved wind speed measurements on 7 June from the three lidar stations deployed in the USCB. The temporal evolution of the boundary layer height is ~~highlighted~~ shown by the dashed black line. Dotted vertical lines mark the time of the different MAMAP observations/overflights on that day at the four clusters (from left to right: green: ~~‘cluster c’~~, red: ~~‘cluster a’~~, cyan: ~~‘cluster d’~~, magenta: ~~‘cluster b’~~). Positions of the three lidars are marked in Fig. 2.

To ~~also~~ get a better ~~overview of the large-scale impression of the large-scale~~ impression of the large-scale wind situation in the ~~entire basin on each day~~ basin, 2D wind fields are extracted from 3D WRF v3.9.1.1 reanalysis data simulations (~~detailed model description will be given in a separate study in the current special issue, see Galkowski et al., in prep.~~) (detailed model description will be given in a separate study in the current special issue, see Galkowski et al., in prep.)

215 These fields are provided at a spatial resolution of  $2 \times 2 \text{ km}^2$  with 15 vertical levels below 3 km altitude, and high temporal resolution with instantaneous values every minute. They are used to identify unfavourable wind conditions, which would prohibit a reliable flux estimate, not obvious in the wind lidar measurements alone. ~~To allow for a better comparison between model~~

and wind lidars, the WRF data are averaged within the boundary layer, as calculated by the modelled PBL parametrization scheme.

220 Additionally, for a better comparability to the wind lidar observations. For this comparison, both data sets are averaged over the entire time of a measurement flight, which is on the order of two to three hours. The results are presented in Sect. 3.1.

### 2.2.3 Flux inversion

The ~~method to derive cross-sectional fluxes has been used widely~~ flux method has been widely used to quantify trace gas emissions, not only from airborne in situ measurements (e.g., Klausner et al., 2020; Krautwurst et al., 2017; Peischl et al., 225 2016; Lavoie et al., 2015; Cambaliza et al., 2015; Turnbull et al., 2011; White et al., 1976), but also remote sensing column observations (e.g., Krings et al., 2018; Amediek et al., 2017; Krautwurst et al., 2017; Frankenberg et al., 2016; Krings et al., 2013) and column observations by satellite instruments (e.g., Reuter et al., 2019). The mass flow through a ~~flight track of trace gas column observations~~ vertical plane below the flight track driven by the local wind field is given by

$$F_{\text{track}} = f \cdot u \cdot \cos(\alpha) \sum_i \Delta V_i \cdot \Delta x_i, \quad (1)$$

230 where  $F_{\text{track}}$  is the resulting flux in  $\text{t CH}_4 \text{ hr}^{-1}$ ,  $u$  is the absolute wind speed in  $\text{m s}^{-1}$  as computed in Sect. 2.2.2 from the wind lidar observations,  $\alpha$  is the angle between the normal of the flight track and the wind direction in degrees,  $\Delta x$  is the cross-sectional length segment in m,  $\Delta V$  is the retrieved  $\text{CH}_4$  column anomaly in  $\text{molec cm}^{-2}$  as described in Sect. 2.2.1, and  $f$  is a conversion factor ( $9.587 \cdot 10^{-25}$ ) ~~guaranteeing the correct unit of the resulting flux  $F_{\text{track}}$  s t  $\text{CH}_4 \text{ molec}^{-1} \text{ hr}^{-1}$~~ . The sum indicates the summation over all observations  $i$  within the plume.

235 The dominant error sources of the computed flux  $F_{\text{track}}$  arise from uncertainties or errors in the estimated wind speed ( $\sim 1 \text{ m s}^{-1}$ ) and wind direction ( $\sim 10^\circ$ ), which can increase to up to  $2 \text{ m s}^{-1}$  and  $40^\circ$  for specific days, the choice of the background observations, and the retrieved  $\text{CH}_4$  column anomalies expressed as column anomaly precision and accuracy ( $\sim 0.22\%$  and  $\sim 0.10\%$ , respectively, as discussed in Sect. A1.2). ~~The error  $\delta F_{\text{track}}$  of the~~ A detailed discussion of the error of the computed flux  $F_{\text{track}}$  of one track is computed by root sum squaring these error sources:-

$$240 \quad \delta F_{\text{track}} = \sqrt{\delta F_u^2 + \delta F_\alpha^2 + \delta F_{\text{bg}}^2 + \delta F_{\text{col-pr}}^2(n) + \delta F_{\text{col-ac}}^2},$$

~~where  $\delta F_u$ ,  $\delta F_\alpha$ ,  $\delta F_{\text{bg}}$ ,  $\delta F_{\text{col-pr}}$ ,  $\delta F_{\text{col-ac}}$  are the errors arising from the wind speed, from the wind direction, from the choice of the background observations, and the column anomaly precision and accuracy in  $F_{\text{track}}$  can be found in Sect. A2.  $\delta F_u$  and  $\delta F_{\text{col-ac}}$  are computed by Gaussian error propagation of Eq. 1.  $\delta F_{\text{col-pr}}(n)$  is also calculated by Gaussian error propagation taking into account its random nature by dividing the value for the estimated precision by  $\sqrt{n}$ , where  $n$  is the number of observations~~  
 245 ~~within the plume. The wind direction modifies the flux via a cosine term and its error can thus not easily be calculated by error propagation. Consequently, we estimate  $\delta F_\alpha$  by varying the prevailing wind direction by its estimated error on a specific day and use the difference to the 'true' flux  $F_{\text{track}}$  as error estimate. The choice of the background observations is investigated by randomly selecting two-thirds of the observations from either side of the plume and computing a new background for one flight~~

track, which is used to calculate a new flux estimate. This is done for up to 500 combinations for each side. The  $1-\sigma$  standard deviation of those fluxes is then used to estimate the error  $\delta F_{bg}$ .

An additional uncertainty source originates from variability in the atmospheric transport caused by turbulence and leading to varying cross-sectional fluxes if estimated from multiple overflights of the same source, which cannot be explained by source variability alone. This variability, expressed as  $\delta F_{atm}$ , is estimated as the  $1-\sigma$  standard deviation (STD) from the overflights themselves and is then combined with the error  $\delta F_{tracks}$ , resulting from the errors of the single tracks, to estimate the standard error ( $1-\sigma$ ) of the averaged flux if multiple overflights of the same source(s) are available:

$$\delta F = \sqrt{\delta F_{tracks}^2 + \delta F_{atm}^2},$$

with

$$\delta F_{tracks} = \frac{\sqrt{\sum_{j=0}^m \delta F_{track,j}^2}}{m},$$

and

$$\delta F_{atm} = \frac{STD(F_{track,j})}{\sqrt{m}}$$

where  $m$  is the number of flight tracks.

### 2.3 Investigated mines and shafts

Investigated coal mines and their annual emissions based on the CoMetv3 inventory for the year 2018. The values for 2016 are only listed for comparison. The locations of clusters are shown in Fig. 2 and the position of the individual ventilation shafts are marked in the result section in Figs. 5, C2, C4, and C6. Cluster-Label of Number of mine shafts #2018-2016 a Halemba-3 3.9-3.3 Śląsk 2-0.5-4.0 b Pniówek 3-20.0-17.5 Zofiówka 2-12.6-13.5 Borynia 2-12.6-9.6 c Brzeszcze-a 2-23.9-9.0 Brzeszcze-b 2-4.2-9.0 d Wesola 2-20.5-16.7 Staszic 2-12.9-9.2 Mysłowice 1-16.7-16.7 Wieczorek-a 1-10.6-14.7 Wieczorek-b 1-5.0--

To reliably measure emissions and assign them to small clusters of coal mine ventilation shafts, MAMAP observations need to be collected in relatively close vicinity relatively close to the respective shafts coal mine ventilation shafts to reliably measure emissions and assign them to the shafts. An adequate maximum distance depends, for example, on the complexity of the investigated area, the density of the occurring sources, and the position of the flight tracks on the different flight days. In general, the further away observations are acquired, the more complicated it is to disentangle observed fluxes from individual or groups of shafts due to potential possible mixing of the different plumes along their way. However, setting the focus to focusing on small clusters and primarily analyzing tracks closest to the shafts also analyzing tracks in the immediate vicinity of the shafts limits the number of available observations observations available. Consequently, as a compromise and for the purpose of this study, we only analyze flight tracks which are within ~15 km of the ventilation shafts. This also reduces the probability of interference of large CO<sub>2</sub> sources, which would have, depending on position, an adverse effect on the reduce the accuracy of

~~the~~ retrieved CH<sub>4</sub> column anomalies (compare to Sect. A1.1). The drawback of this approach is that most clusters of shafts releasing CH<sub>4</sub> were only observed once during each flight. However, ~~as observed in other studies and as discussed in Sect. 2.2.3,~~ fluxes estimated from ~~multiple several individual~~ overflights can vary significantly as a result of ~~turbulenceatmospheric turbulence~~ (Sect. 2.2.3), which leads to CH<sub>4</sub> column maxima and minima. To address this issue, we only ~~try to separate and~~ estimate emissions from clusters of ventilation shafts when at least ~~2 two~~ overflights are available. Additionally, the plume and background regions must be ~~clearly distinguishable as they are selected by visual inspection. This is not the case, for example, if the flight track passes over lakes, which have a very low reflectivity in the SWIR spectral region and thus poor signal to noise ratio. Consequently observations acquired over water bodies are thus not considered in this study.~~ ~~visually distinguishable in the data for a feasible flux estimate.~~

Four clusters of ventilation shafts ~~, illustrated in~~ (Fig. 2~~),~~ were identified based on the ~~above mentioned above mentioned~~ boundary conditions. The clusters are labelled as ~~'cluster a'~~ to ~~'cluster d'~~ starting in the north and counting counter-clockwise. They comprise ~40% of all CH<sub>4</sub> mining emissions in the region according to ~~the CoMetv3 annual emissions from the CoMet ED v4~~ inventory. The annual CH<sub>4</sub> emissions, the name of the mines, and the number of shafts are listed in Table 1. Depending on the position of the ~~actual~~ flight track, which depends on the prevailing wind direction ~~and cloud cover~~ on a specific day and ~~cloud cover and~~ the Air Traffic Control (ATC) restrictions in that region, not all shafts of a cluster could be ~~investigated during each flight covered by each track.~~ This led to the ~~investigation of smaller additional investigation of~~ sub-clusters, as discussed further below (Sect. 3.2).

#### 295 2.4 ~~CoMetv3 CoMet ED v4~~ emission inventory

The core of the ~~CoMetv3 inventory CoMet ED v4 inventory~~ (Galkowski et al., 2021) comprises annual CH<sub>4</sub> emissions, primarily based on data from the European Pollutant Release and Transfer Register (E-PRTR) and the Polish Wyższy Urząd Górniczy (WUG, Higher Mining Administration). As ~~in both E-PRTR and the WUG report the data is reported emissions~~ at the facility level, these had to be disaggregated to individual ventilation shafts~~for this study. Thus, we equally.~~ We divided annual emissions ~~to each shaft equally among the shafts~~ of the reporting mine~~, as more detailed data is not readily available.~~ Such disaggregation can lead to large uncertainties, ~~as emissions are varying since emissions may vary~~ due to changes in excavation activities over the year, ~~connected related~~ to changes in mining fronts, variations in airflow driven by safety considerations (including methane concentration below ground) etc. The ~~resulting~~ CH<sub>4</sub> emissions ~~for 2018~~ are displayed for the ~~different individual~~ shafts in Fig. 2 ~~for 2018~~ and listed for the investigated clusters in Table 1 for the years 2016 and 2018.

305 ~~However, minutely or hourly resolved emissions measured directly at the investigated shaft during~~  
~~However, for comparison with instantaneous measurements like ours, emissions with minute or hourly resolution that were measured directly in the investigated shafts at the time of investigation should be optimally used for comparison to high-resolution measurements like those analyzed here observation should ideally be used.~~ Therefore, ~~for a subset of we also derived hourly emissions for individual shafts for those~~ coal mines that agreed to provide such information~~, we derived hourly emissions for each shaft within the CoMet project.~~ This data is based on concentrations and airflows measured directly upstream of the outlet of the ventilation shaft. The uncertainty of these hourly emissions is estimated to be 20% of the reported value

**Table 1.** Investigated coal mines and their annual CH<sub>4</sub> emissions based on the CoMet ED v4 inventory for the year 2018. The values for 2016 are only listed for comparison. The locations of clusters are shown in Fig. 2 and the position of the individual ventilation shafts are marked in the result section in Figs. 5, C2, C4, and C6.

| Cluster                                 | Name of mine | Number of shafts [#] | CH <sub>4</sub> emission per shaft |      |
|-----------------------------------------|--------------|----------------------|------------------------------------|------|
|                                         |              |                      | 2018                               | 2016 |
| [ kt CH <sub>4</sub> yr <sup>-1</sup> ] |              |                      |                                    |      |
| a                                       | Halemba      | 3                    | 3.9                                | 3.3  |
|                                         | Śląsk        | 2                    | 0.5                                | 4.0  |
| b                                       | Pniówek      | 3                    | 20.0                               | 17.5 |
|                                         | Zofiówka     | 2                    | 12.6                               | 13.5 |
|                                         | Borynia      | 2                    | 12.6                               | 9.6  |
| c                                       | Brzeszcze-a  | 2                    | 23.9                               | 9.0  |
|                                         | Brzeszcze-b  | 2                    | 4.2                                | 9.0  |
| d                                       | Wesoła       | 2                    | 20.5                               | 16.7 |
|                                         | Staszic      | 2                    | 12.9                               | 9.2  |
|                                         | Mysłowice    | 1                    | 16.7                               | 16.7 |
|                                         | Wieczorek-a  | 1                    | 10.6                               | 14.7 |
|                                         | Wieczorek-b  | 1                    | 5.0                                | -    |

due to lacking information about the calibration procedures and instrument precision levels. ~~A detailed comparison between the measured hourly resolved emissions, the reported annual emissions, and the observed fluxes derived from MAMAP data gives Sect. 4.~~

### 315 3 Results

~~This section presents the results based on the methods and data described in Sect. 2. Initially, more and less favourable flight days are identified using PBL-averaged wind fields from WRF and the wind lidar data. Secondly, the cross-sectional fluxes for one cluster ('cluster b') are presented in detail but then summarized for the remaining clusters.~~

#### 3.1 Wind situation over the basin

320 ~~For~~ Overall, the WRF model simulations support the observations by the wind lidars. Exceptions might occur during low wind conditions.

Observations from the wind lidar stations are available for all five measurement days (28, 29 May and 1, 6, 7 June 2018); ~~observations from the wind lidar stations are available.~~ Figure 4 illustrates two ~~extreme and one not so~~ less and one favourable

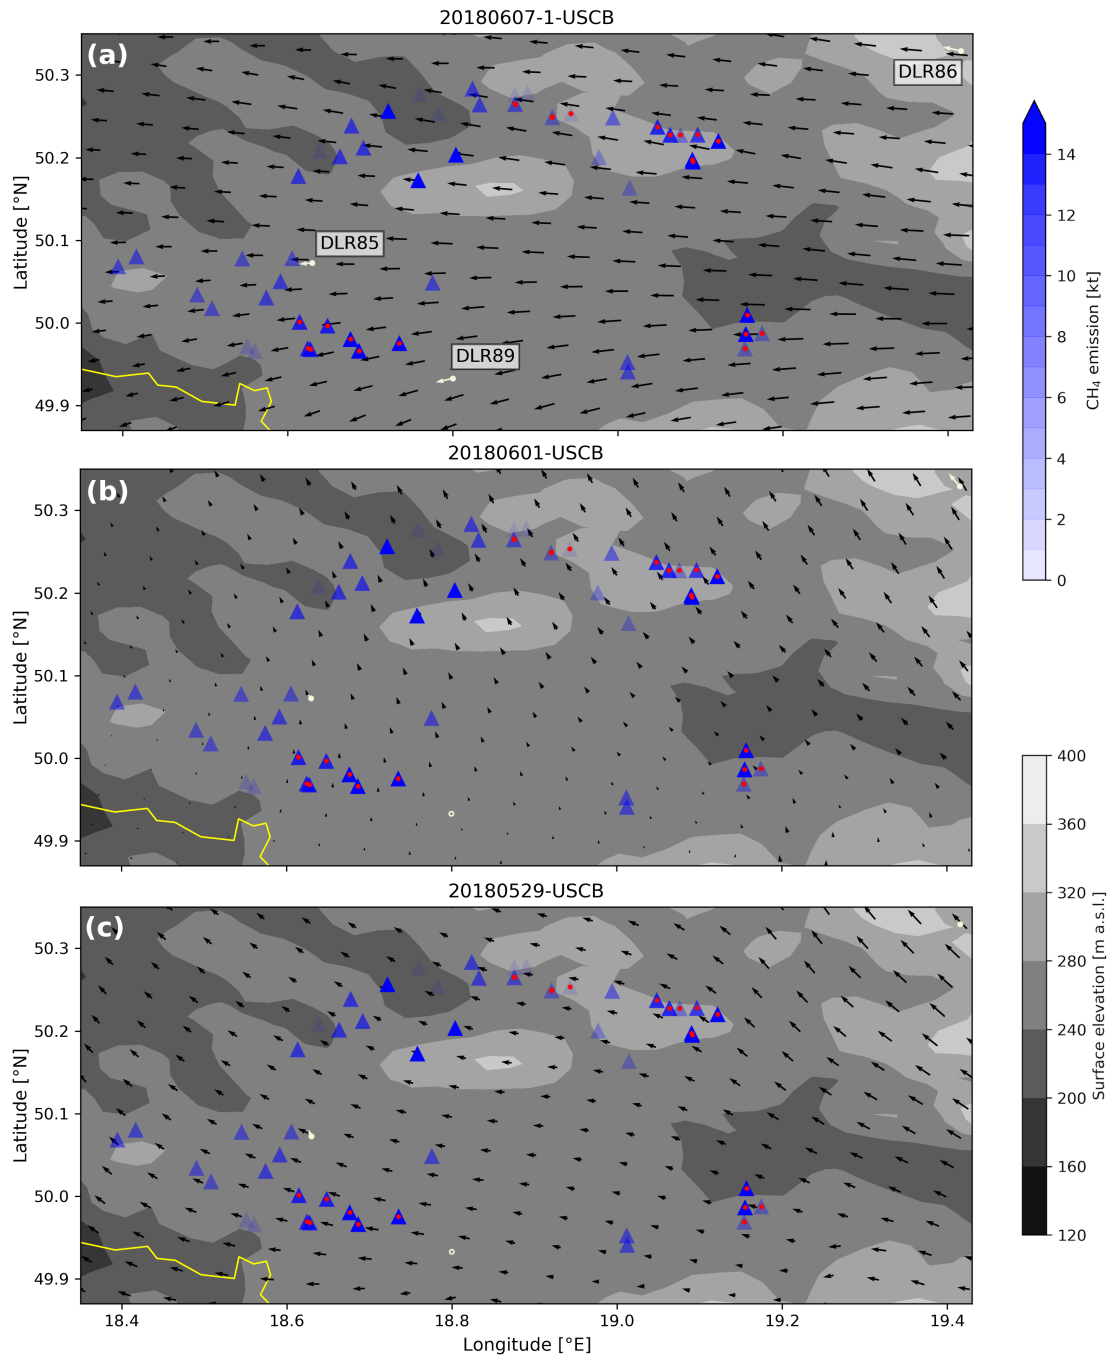

**Figure 4.** Wind situation in the USCBA on three different days. Similar to Fig. 2 but complemented by the PBL averaged 2D wind field from the WRF model simulations (black arrows) and the observed wind at the three lidar stations (white arrows). Panel (a) shows favourable and (b) and (c) less favourable wind conditions on 7 June, 1 June, and 29 May, respectively.



case. Panel (a) shows the simulated PBL-averaged 2D wind field for On 7 June between 9:30 and 11:45 local time. It exhibits  
325 the simulated PBL-averaged 2D wind field shows a homogeneous flow from east to west ~~with some divergence to the north in  
the northern part and to the south in the southern part of the field (black arrows)~~. Additionally, the winds estimated from the  
three wind lidars (white arrows) agree ~~well in speed as well as in direction~~ with the prediction of the model simulation. Similar  
situations occur for 28 May and 6 June, which also ~~exhibited~~ exhibit easterly flows (see Fig. B1).

~~The situation changed~~ The situation differed on 29 May (c). According to the WRF simulations, the wind speed is signifi-  
330 cantly lower in some parts of the basin and more variable than on 7 June ~~changing from an easterly flow in the middle of the  
basin to a south-easterly flow in the western and eastern basin~~. The low wind speed is also confirmed by the wind lidars ob-  
serving winds of around  $2 \text{ m s}^{-1}$ . Whereas winds from the western lidar (DLR85) appear to agree with the WRF simulations,  
those from the lidar in the east of the region (DLR86) observe significantly lower wind speeds than predicted by the model  
(no observations are available for the southern lidar, DLR89, on that day). On 1 June (b), the wind lidars observe a strong  
335 gradient in wind speed from west to east with winds blowing from the south-south-east. This is also well captured by the WRF  
simulations.

~~Overall, the WRF model simulations support the observations by the wind lidars. Exceptions might occur during low wind  
conditions.~~

During low and variable wind conditions as occurring on 1 June in the south-western basin and also on 29 May, an accumu-  
340 lation or recirculation of the emitted  $\text{CH}_4$  ~~is not entirely excluded. If clusters having a small number of shafts are investigated  
and observations are acquired in close vicinity cannot be excluded. This is less problematic for clusters with few shafts or  
cases where observations were made close~~ to the shafts, ~~this may be less problematic~~. Another limitation results from the  
cross-sectional flux method introduced in Sect. 2.2.3. The transport through the cross-section described by Eq. (1) must be  
dominated by advection and not diffusion. For wind speeds ~~less~~ smaller than  $2 \text{ m s}^{-1}$ , however, diffusion becomes more  
345 prominent ~~(Sharan et al., 1996)~~. (Sharan et al., 1996).

## 3.2 Estimated cross-sectional fluxes

The following sections present the estimated cross-sectional fluxes and their corresponding errors. <sup>2</sup>‘Cluster b’ was investigated  
during all flights and, consequently, this cluster of shafts has the most comprehensive collection of measurements. It is discussed  
in more detail below, followed by shorter discussions concerning the three other clusters.

### 350 3.2.1 Cluster b

<sup>2</sup>‘Cluster b’ comprises 7 ventilation shafts from the three mines Pniówek (3), Zofiówka (2), and Borynia (2). They are located  
in the south-western part of the basin near the ~~border of the Czech Republic~~ Czech border. Their emissions were observed  
~~by the MAMAP remote sensing instrument~~ during all six flights, although not all shafts were covered on all days due to the  
position of the flight tracks. ~~These depended on the prevailing wind direction, cloud conditions, and ATC restrictions which  
also included limitations on crossing the border of the Czech Republic with the FUB Cessna.~~

~~The resulting~~

The wind speeds at 'cluster b' as derived from the lidar stations were generally around 5 to 6  $\text{m s}^{-1}$  and dropped to around 2  $\text{m s}^{-1}$  on 29 May and 1 June. The  $\text{CH}_4$  column anomalies along the different flight tracks retrieved from the observations are shown in Fig. 5. The general knowledge of the wind is shown by the wind field from the WRF model simulation. The red arrow depicts the prevailing wind derived from the lidar stations (which is also used in the cross-sectional flux method). In most cases, the derived wind directions wind directions derived from the lidar stations are consistent with the locations location and extent of the visually observed  $\text{CH}_4$  column enhancements, representing plumes, and the location of ventilation shaft(s); from which the observed is most probably emitted. Reasonable agreement between the wind lidar estimate and the position of the observed plume is even found on 29 May and 1 June, when low and variable winds prevailed. The In general, the simulated 2D wind fields match the observed plume(s) and the wind from the wind lidar stations well. The largest differences between model and observations are found on days with low wind speeds according to the wind lidar stations, namely 29 May (Fig. 4, b) and 1 June (Fig. 4, c), as already identified in Sect. 3.1. The wind speeds at 'cluster b' as derived from the lidar stations were generally around 5 to 6s and dropped to around 2on 29 May and 1 June.

In terms of emission estimates, only Only the flight on 28 June covered ventilation shafts from all three mines (sub-cluster 'PZB'). Only the The Pniówek mine alone was investigated on the two days with low wind speeds (on 29 May and 1 June, sub-cluster 'P'), and Pniówek and Zofiówka together were covered on 6 and 7 June (sub-cluster 'PZ'). The individual or single flux estimates and their related uncertainties for 'cluster b' and its sub-clusters are summarized in Table 2 ('single' refers here to the flux of one overflight or track). The most overflights performed on multiple days were acquired Most overflights on different days were recorded for the Pniówek and the Zofiówka shafts. The single cross-sectional fluxes originating from these two mines with five shafts vary between 4.7 and 12.8  $\text{t CH}_4 \text{ hr}^{-1}$  with combined errors (according to Eq. (A3)) of around 18 % to 34 % on the single fluxes. The error due to variability in the atmospheric transport, which needs to be considered as an additional error source for the averaged flux as discussed in Sect. 2.2.3A2, is at the upper end of this range with around 32 % and reduces to 12 % when accounting for the number of available flight racks flight tracks available (compare to Eq. (A6)). The averaged flux for this sub-cluster is 9.2  $\text{t CH}_4 \text{ hr}^{-1}$  with a standard error of 1.4  $\text{t CH}_4 \text{ hr}^{-1}$  (or 15 %, calculated according to Eq. (A4)), which compares well to with the reported annual  $\text{CH}_4$  emission of 9.7  $\text{t CH}_4 \text{ hr}^{-1}$ . Even for the observations under low wind conditions on 29 May and 1 June (sub-cluster 'P'), the estimated averaged flux agrees within 2 with the annual inventory value within 2 %.

As discussed in Sects. 2.2.3 and 2.3, fluxes derived from one single overflight might differ significantly from the true emissions. The estimated flux, and also its error, flux observed on 28 May is listed for the sake of completeness and should be interpreted with caution, although it agrees within ~20 with the reported emissions within ~20 % in this case. A closer look at the inventory values and the observed averaged fluxes is given in Sect. 4.

The dominant error source (Table 2) of the single fluxes is the wind speed (and for some tracks the wind direction) followed by the accuracy of the retrieval and the choice of the background observations. The single-measurement precision of the MAMAP instrument is mostly negligible. The error on the wind speed is usually between 0.5 and 1.2  $\text{m s}^{-1}$ , leading to errors on the estimated flux of around 10 % to 25 % assuming a wind speed of ~5  $\text{m s}^{-1}$ . However, for example, on 1 June the magnitude of the wind was small and variable and its error is larger than the absolute value of 1.8  $\text{m s}^{-1}$  used for the flux

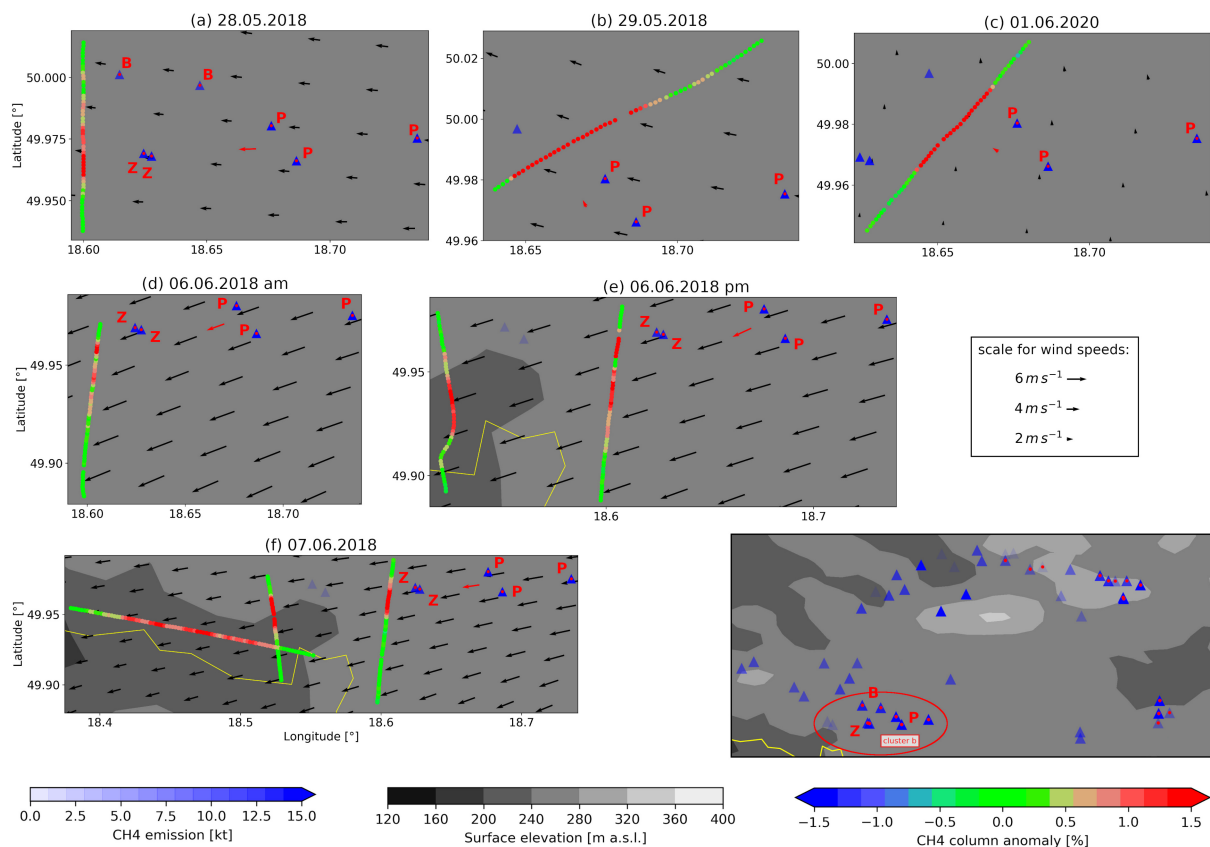

**Figure 5.** WFM-DOAS retrieval results (coloured circles) for CH<sub>4</sub> emission plume(s) originating from shaft shafts in 'cluster b' in the south-western part of the basin during the six different overflights. For visualization only, the anomalies are smoothed by a 3-point moving average. The corresponding cross-sectional fluxes are summarized in Table 2 and detailed cross-sections are found in Fig. C1. The grey shaded-area in the background shading indicates the terrain height and the border to the Czech Republic is represented by the yellow solid-line. Black arrows illustrate the wind field based on WRF model simulations and red arrows indicate the wind at the position of the cluster/flight track at the time of the overflight as derived from the three wind lidar stations. Bluish triangles indicate reported annual emissions according to the CoMetv3-CoMet ED v4 inventory and single letters are abbreviations for the ventilation shafts as listed in Table 1 (B: Borynia, Z: Zofiówka, P: Pniówek). Red dots mark the shafts responsible for attributed to the observed enhancement. On 7 June, four tracks were acquired, however, two tracks are right on top of each other. Overview-The overview map in the lower right corner is similar to Fig. 2 and highlights the investigated area and shafts by a red solid ellipse.

estimate. This leads to an error of over 100% on the single flux estimate and explains the large standard error of over more than 50% on the averaged flux for the Pniówek shafts alone (sub-cluster 'P').

**Table 2.** Cross-sectional flux estimates for shaft <sup>2,4</sup>‘cluster b’ located in the south-western part of the basin during six different flights and the corresponding winds as derived from the three wind lidar stations (left part). The right part gives the errors of the five components in % of the computed flux. Footnote states which mines (number in brackets gives the number of shafts) were investigated. The stated errors of the mean flux (if more than one overflight was available) comprises the uncertainty from the error propagation of the cross-sectional flux method and the track to track variability (or atmospheric turbulence) according to Eq. (A4) as discussed in Sect. 2.2.3A2. The last two rows give the annual [kt yr<sup>-1</sup>] and annually scaled emissions to one hour [t hr<sup>-1</sup>] of 2018 based on the [CoMetv3-CoMet ED v4](#) inventory ([Table Table 1](#)) for comparison with the observed averaged fluxes. For certain shafts, real hourly emissions are available and discussed in Sect. 4.

|                         | Flux                                   |                  |                 |                       | Errors    |       |           |                      |          |           |
|-------------------------|----------------------------------------|------------------|-----------------|-----------------------|-----------|-------|-----------|----------------------|----------|-----------|
|                         | Estimate                               |                  |                 | Wind                  |           | Wind  |           | Background           | Column   |           |
|                         | PZB <sup>a)</sup>                      | PZ <sup>b)</sup> | P <sup>c)</sup> | speed                 | direction | speed | direction | choice               | accuracy | precision |
|                         | [ t CH <sub>4</sub> hr <sup>-1</sup> ] |                  |                 | [ m s <sup>-1</sup> ] |           |       |           | [%] of flux estimate |          |           |
| 28 May                  | 10.4                                   |                  |                 | 5.2                   | 88        | 23    | 4         | 3                    | 11       | 2         |
| 29 May                  |                                        |                  | 8.1             | 2.2                   | 151       | 27    | 42        | 4                    | 7        | 2         |
| 01 June                 |                                        |                  | 5.9             | 1.8                   | 129       | 116   | 8         | 5                    | 4        | 3         |
| 06 June, am             |                                        | 6.9              |                 | 5.6                   | 70        | 18    | 9         | 7                    | 17       | 4         |
| 06 June, pm             |                                        |                  |                 |                       |           |       |           |                      |          |           |
| track 1                 |                                        | 12.8             |                 | 6.2                   | 63        | 8     | 11        | 6                    | 9        | 4         |
| track 2                 |                                        | 11.6             |                 | 6.5                   | 68        | 11    | 6         | 9                    | 12       | 6         |
| 07 June                 |                                        |                  |                 |                       |           |       |           |                      |          |           |
| track 1                 |                                        | 7.7              |                 | 5.3                   | 82        | 23    | 23        | 2                    | 11       | 1         |
| track 2                 |                                        | 8.9              |                 | 5.2                   | 80        | 20    | 5         | 4                    | 11       | 3         |
| track 3                 |                                        | 4.7              |                 | 5.3                   | 82        | 22    | 9         | 5                    | 12       | 3         |
| track 4                 |                                        | 11.5             |                 | 5.5                   | 83        | 16    | 9         | 6                    | 7        | 4         |
| Average                 | 10.4*                                  | <b>9.2</b>       | <b>7.0</b>      |                       |           |       |           |                      |          |           |
| Error                   |                                        |                  |                 |                       |           |       |           |                      |          |           |
| [ t hr <sup>-1</sup> ]  | 2.7                                    | 1.4              | 4.1             |                       |           |       |           |                      |          |           |
| [%]                     | 26                                     | 15               | 59              |                       |           |       |           |                      |          |           |
| Inventory               |                                        |                  |                 |                       |           |       |           |                      |          |           |
| [ kt yr <sup>-1</sup> ] | 110                                    | 85               | 60              |                       |           |       |           |                      |          |           |
| [ t hr <sup>-1</sup> ]  | 12.6                                   | <b>9.7</b>       | <b>6.8</b>      |                       |           |       |           |                      |          |           |

\*based on only one single overflight.

<sup>a)</sup>Pniówek (3), Zofiówka (2), and Borynia (2). <sup>b)</sup>Pniówek (3), Zofiówka (2). <sup>c)</sup>Pniówek (3).

### 3.2.2 Clusters a, c, and d

395 For the remaining clusters, the retrieved CH<sub>4</sub> anomalies are shown in Figs. C2, C4, and C6, and the computed cross-sectional fluxes are listed in Table C1.

~~Similar to~~ Similar to 'cluster b', the derived wind directions are consistent with the position of ventilation shafts ~~under investigation~~ and the observed plumes. Wind speeds measured by ~~lidar~~ wind lidars were around 5 to 6 m s<sup>-1</sup>. Exceptions occur ~~again~~ on 29 June and 1 June, when only low and variable winds were encountered having speeds of between 1.6 to 2.9 m s<sup>-1</sup> according to the lidar observations.

Estimated averaged cross-sectional fluxes for 'clusters a', 'c', and 'd' range from ~~as low as~~ 1 to ~~up to~~ ~8 t CH<sub>4</sub> hr<sup>-1</sup>. ~~As for~~ Similar to 'cluster b', not all shafts of one cluster could be investigated on all days, leading to a further division into ~~five several~~ sub-clusters ~~in total~~. Standard errors on the averaged fluxes of ~~one each~~ sub-cluster are usually around 20 %. Larger errors occur during low wind conditions (e.g., at sub-cluster 'WSMW' of 'cluster d' with 46 %) or if the fluxes are small and/or only a limited amount of overflights ~~are is~~ available (e.g., at sub-cluster 'HS' of 'cluster a' with 42 %). ~~A more detailed comparison of the retrieved fluxes with those from inventories is given in the next section.~~

An example, in which the investigation of all ventilation shafts of one cluster ~~on specific days is not feasible~~ is restricted by surface features, is given for 'cluster c'. The flight track is located ~~downwind to the west~~ of four shafts belonging to Brzeszcze ~~towards the west~~ on 6 and 7 June (Fig. C4). However, the plume of the northernmost shaft could not be quantitatively investigated because it was always located directly over an area covered by lakes, which ~~do not allow for prevent~~ passive remote sensing observations ~~because water surfaces have a very low reflectivity in the SWIR and thus a poor signal to noise ratio~~. During the flight on ~~the~~ 1 June all four shafts were covered. However, ~~in addition to the low wind speeds~~, only one overflight is available and ~~the wind speed was low and~~, therefore, the flux is only listed ~~as a matter for the sake~~ of completeness.

## 4 Comparison to inventories

415 ~~As Since~~ the MAMAP measurements represent a "snapshot" of the emissions of small clusters of ventilation shafts ~~for a short time interval~~, comparisons to annually resolved and/or coarsely gridded inventories should be ~~performed carefully, and even then conclusions drawn can be of limited value. It is therefore not expected treated with care. We do not expect~~ that the emissions derived from the observed cross-sectional fluxes ~~are to be~~ identical to the reported annual emissions. The reasons for fluctuations in mining emissions are diverse (compare to ~~Sect. 2.4~~) and the MAMAP observations are strictly speaking only ~~valid for the time of the overflight~~ Sects. 1 and 2.4). Some of the measured hourly ~~data in the CoMetv3 emissions in the CoMet ED v4~~ inventory not only indicate fluctuations from hour to hour but also differences between the emissions from different ventilation shafts of one mine. Detailed hourly emission data were for example collected for the three Pniówek shafts for the time period between 14 May and 13 June ~~2018-2018 (see Fig. 6)~~. Maximum hour to hour fluctuations reach up to ~70 % of the ~~averaged average~~ emissions for a single shaft over the 1 month of measurements. For the entire mine, i.e. three shafts ~~combined~~, fluctuations can still reach ~30 %.

There is no obvious diurnal cycle, but a weekly cycle is found for at least the first part of the time series. Detailed hourly emissions were not only collected for the Pniówek but also for the Zofiówka shafts of ‘cluster b’ (see Table 3).

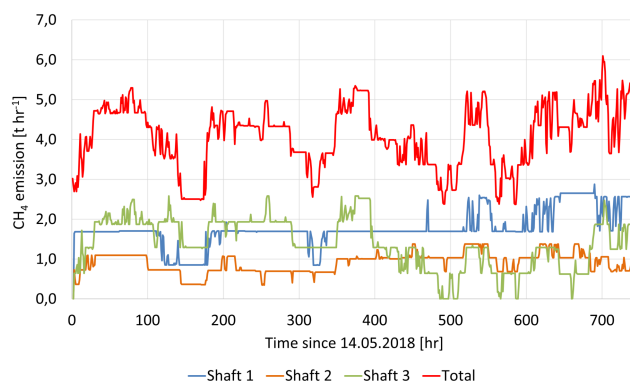

**Figure 6.** Detailed hourly emissions for the three shafts of the Pniówek mine and the entire mine.

For the observations on 29 May and 1 June, where only the Pniówek shafts were investigated and low winds prevailed, the measured averaged hourly emissions for the time of the overflights are  $4.5 \text{ t CH}_4 \text{ hr}^{-1}$  (~34 % lower than the reported annual emissions). The term ‘averaged hourly emissions’ refers to the in situ data measured within a shaft according to the CoMet ED v4 inventory. The observed averaged flux derived from MAMAP data is  $(7.0 \pm 4.4) \text{ t CH}_4 \text{ hr}^{-1}$ . This flux is larger than the measured hourly emissions, however, it was recorded under low wind conditions and is only based on two overflights, both of which call for caution in its interpretation.

**Table 3.** Comparison of observed averaged fluxes based on MAMAP data with annually reported emissions and measured averaged hourly emissions, when available. The measured averaged hourly emissions are additionally split into the contribution of the three shafts for Pniówek and two shafts for Zofiówka. See also main text for further details.

| Dates          | Cluster | MAMAP | Annual | Hourly | [ t CH <sub>4</sub> hr <sup>-1</sup> ] |          |
|----------------|---------|-------|--------|--------|----------------------------------------|----------|
|                |         |       |        |        | Pniówek                                | Zofiówka |
| 29 May, 1 June | b, P    | 7.0   | 6.8    | 4.5    | 1.8, 1.7, 1.0                          |          |
| 6, 7 June      | b, PZ   | 9.2   | 9.7    | 6.2    | 1.8, 0.9, 0.4                          | 2.0, 1.2 |
| 6, 7 June      | c, B2   | 2.9   | 3.7    | 2.8*   | -                                      |          |

\*value is not based on hourly data but partly composed of monthly data between 14 May and 13 June and annual data.

The measured averaged hourly emissions for the Pniówek and Zofiówka shafts, which were investigated on 6 and 7 June are  $6.2 \text{ t CH}_4 \text{ hr}^{-1}$ , which is ~36 % lower than the annually reported emissions. Although reasonable winds prevailed and 7 tracks were acquired in total, the averaged-average observed flux based on MAMAP observations is  $(9.2 \pm 1.4) \text{ t CH}_4 \text{ hr}^{-1}$  and thus, ~49 % larger than the measured hourly emissions. Additionally, the share of emissions between the three Pniówek shafts is at

~~a ratio of about 5:2:1 on average during the time of the MAMAP observations as indicated by the measured hourly data.~~ The mismatch between the observed fluxes and hourly emissions might be related to missing CH<sub>4</sub> sources which are not explicitly accounted for in the hourly data. CH<sub>4</sub> is for example not only ventilated through the ventilation shafts, but also drained from excavations and transported to drainage stations in the area. Consequently, CH<sub>4</sub> is also released from the drainage system. Those emissions are included in the annually reported emissions but not in the measured hourly data. Additionally, some tracks might also be affected by the two Jastrzebie shafts which are faintly visible in Fig. 5 at around 18.57° E and 49.97° N. According to the ~~CoMetv3~~ CoMet ED v4 inventory, their annual emissions are reported as 0.3 t CH<sub>4</sub> hr<sup>-1</sup> in total and thus are negligible. However, the measured averaged hourly emissions at the time of the overflights are ~1 t CH<sub>4</sub> hr<sup>-1</sup> in total, which might influence tracks further downwind, ~~but due~~. Due to the scatter of the observed fluxes, this effect cannot be investigated further. Taking into account these effects and ~~also~~ the standard error of the averaged observed flux derived from MAMAP data (1.4 t CH<sub>4</sub> hr<sup>-1</sup>) and the error of the measured hourly emissions, ~~which is given with~~ (~1.2 t CH<sub>4</sub> hr<sup>-1</sup>, or 20 %), the two values are not significantly different.

For cluster c', which consists of four shafts, the ~~CoMetv3~~ CoMet ED v4 inventory only provides a monthly mean value for ~~a one month~~ the one-month period between 14 May and 13 June in 2018 for the two high emitting shafts of Brzeszcze-a but no hourly resolved data. The emissions of these shafts are ~~given as~~ 1.9 and 1.7 t CH<sub>4</sub> hr<sup>-1</sup>, which ~~are~~ is ~35 % lower than their reported annual value of 2 × 2.7 t CH<sub>4</sub> hr<sup>-1</sup> (Table 1). For the two remaining lower emitting shafts, only the annual emissions of 2 × 0.5 t CH<sub>4</sub> hr<sup>-1</sup> are available. The investigated sub-cluster B2' of cluster c' covers one Brzeszcze-a and the two Brzeszcze-b shafts, resulting in hourly emissions of 2.8 t CH<sub>4</sub> hr<sup>-1</sup> (average of the monthly emissions of the two Brzeszcze-a plus the annually reported value for one Brzeszcze-b shaft), which agrees very well with the observed averaged flux of (2.9 ± 0.5) t CH<sub>4</sub> hr<sup>-1</sup> (Table C1).

For the two remaining clusters a' and d', only the annual emissions are available. For cluster a', there is good agreement for the sub-cluster H', ~~only observing~~ consisting of two Halemba shafts (1.0 vs. 0.9 t CH<sub>4</sub> hr<sup>-1</sup>, Table C1). However, for the sub-cluster HS', which also includes two Śląsk shafts, the observed averaged flux is larger than the reported annual value by a factor of three. This might be explained by the limited ~~amount~~ number of overflights and/or ~~to~~ by the variability of the shaft emissions. A similar situation ~~is found~~ exists for the sub-clusters of cluster d'. In the case of favourable wind conditions as for sub-cluster WMW', annually reported emissions and observed average fluxes agree better than for less favourable conditions as for sub-cluster WSMW'.

## 465 5 Discussion

During the CoMet campaign several coal mine ventilation shafts have been investigated by means of passive remote sensing MAMAP and wind lidar observations. The focus was set to small groups of shafts to allow for a better source attribution of the measured CH<sub>4</sub> enhancements along the flight tracks and to distinguish emissions from different groups of shafts. ~~Emissions of groups of shafts could be well separated from each other and their emissions at the time of the overpass were determined~~

470 ~~for several days~~In the following, limitations of the applied methods, error sources, and possible improvements are discussed in detail.

The single cross-sectional fluxes for different clusters estimated from the different flight tracks vary from ~1 to 14 for the time of the observation. ~~Related combined errors of the~~ Errors of the single fluxes, mainly dominated by the error of the estimated wind speed and direction and the retrieved CH<sub>4</sub> columns, are between 20 % to 120 % of the respective single flux. Large errors are found, ~~on the one hand, either~~ when the observed flux is relatively low. ~~This implies that the emissions originate or under low wind conditions. Low fluxes~~ from a weak CH<sub>4</sub> source, ~~leading lead~~ to a small signal in the observed CH<sub>4</sub> column anomalies, and the error is thus dominated by the instrument's noise or retrieval accuracy. ~~On the other hand, large errors can also occur under low wind conditions when the error in~~ At low wind speeds, the error of the wind speed is as large as the prevailing wind itself. ~~However, both~~ Both error contributors should, ~~however,~~ not be evaluated independently because the strength of the observed CH<sub>4</sub> anomalies inversely depends on wind speed. For the current investigation, wind speeds around 4 to 6 m s<sup>-1</sup> with an estimated error of ~1 m s<sup>-1</sup> appear to be optimal, resulting in acceptable wind errors of around 20 % on the single flux with well-detectable CH<sub>4</sub> signals in most cases.

Additional ~~sources of error~~ errors are caused by the variability of atmospheric transport arising for example from turbulence. Depending on the stability of the atmosphere, observed fluxes might vary significantly from flight track to flight track even if the emission strength does not change over time. In the present study, this effect has been approximated by evaluating the standard deviation of all tracks belonging to one sub-cluster. For instance, the error which arises from our current inability to describe turbulence and other molecular mixing, which impact on plume propagation, is estimated to be 30 % of the averaged flux (before accounting for the number of tracks) for the sub-cluster 'PZ' of 'cluster b'. ~~This estimate is based on seven flight tracks and is therefore more reliable than the estimate for sub-cluster 'HS' of 'cluster a' based on only two flight tracks and resulting in 50.~~ This also means that (1) fluxes based on only one track can significantly deviate from the true flux and should not be considered for evaluation of reported emissions. ~~Independent of the number of tracks measured, the error arising from the lack of knowledge of the plume dispersion, which depends on turbulence and our understanding of the mixing and propagation of the plume, is as important as our current knowledge of the wind parameters and column observations. Further and (2) further~~ research such as the use of higher resolution plume modeling is required to better understand characterize and minimize this source of error.

The errors are significantly reduced by averaging multiple tracks. Under favourable conditions (reasonable winds, multiple flight tracks), the standard error can be reduced to below 20 % of the averaged flux. However, the standard error of the averaged fluxes can also increase to up to 60 % under less favourable conditions (low and variable winds, turbulent atmosphere, few flight tracks, low CH<sub>4</sub> emissions).

500 The calculation of the cross-sectional flux (Eq. (1)) implies that a good wind estimate is as important as precise CH<sub>4</sub> column anomalies. In the presented study, winds were derived from three wind lidar stations deployed in the USCB. Although the prevailing wind at a specific cluster was interpolated from these stations, the wind direction agrees well with the observed location of CH<sub>4</sub> enhancements. Larger discrepancies occur only on days with low and variable winds. On the one hand, this might be attributed to missing wind observations at the southern lidar station on those days. On the other hand, a comparison



505 to WRF v3.9.1.1 model simulations revealed that on those days the wind speed and direction have the largest variability across the basin. We infer that the number of measurements by three stationary wind lidars does not reveal the full complexity of mixing and plume propagation in these conditions. However, modelled wind fields match the wind lidar observations for the remaining days with higher wind speeds. To reflect the effect of a variable wind field across the basin also in the final result, the error of the wind was estimated as 1- $\sigma$  standard deviation of the observed winds at the three lidar stations. This additionally captures the uncertainty related to wind shear and ~~the lack of knowledge of the~~ exact vertical distribution of the ~~emissions~~ emission plume within the boundary layer.

An important result of this study is the accurate separation of observed fluxes to specific ventilation shafts or clusters of ventilation shafts. ~~As~~ Since the MAMAP instrument observes the total atmospheric air column, ~~measurements fluxes~~ can also be ~~acquired deduced~~ when the emission plume is not entirely ~~vertically well-mixed mixed vertically~~ within the PBL. This allows ~~for observations the emission to be observed~~ closer to the emission source than it would be ~~possible sensible~~ with airborne in situ instruments. ~~To derive reliable fluxes, they~~, which generally need to acquire concentration measurements further downwind of a source, where the emissions are well-mixed. ~~This is, to derive reliable fluxes. This comes~~ at the expense of an ~~increasing probability increased likelihood~~ that plumes from different sources ~~overlap, which complicates separation~~. ~~To will overlap, making separation difficult. To adequately~~ capture vertical inhomogeneities of emissions ~~near the in the vicinity of the~~ source by airborne in situ observations ~~adequately,~~, time-consuming dense flight patterns ~~, which are time consuming, need to be performed must be carried out,~~ as, e.g., described in Conley et al. (2017). However, similar ~~issues are also encountered for the single nadir measurements of~~ problems also arise with the individual nadir measurements by MAMAP when moving to larger scales due to the large number of ~~shafts in that region. Additionally, on larger scales, wells in this region.~~ In addition, emissions of unknown origin could ~~potentially occur and complicate interpretation. To unambiguously possibly~~ occur on a larger scale and make interpretation more difficult. In order to clearly assign measured enhancements to sources, imaging instruments ~~observing multiple are required that observe several~~ pixels across the flight track in one time step and ~~; thus, creating a 2-dimensional thus create a two-dimensional,~~ gapless map of the anomalies below the aircraft ~~are needed.~~ Examples are the AVIRIS-NG (Thorpe et al., 2017, 2016) and Mako (Tratt et al., 2014) airborne instruments, or the MAMAP 2D instrument, which will combine MAMAP's high spectral sampling, sensitivity and specificity with imaging capability, currently being developed at the Institute of Environmental Physics (IUP), Bremen.

When evaluating MAMAP observations on the scales of clusters of shafts, ~~one also needs to consider~~ light path errors must also be taken into account, which would lead to changes in the retrieved CH<sub>4</sub> column without any real change in its atmospheric concentration (compare to Sects. 2.2.1 and A1). To reduce the light path errors, the CH<sub>4</sub> over CO<sub>2</sub> proxy method was applied. This method is only valid if the atmospheric CO<sub>2</sub> background concentration remains constant during the flight i.e. there are no significant CO<sub>2</sub> sources in the area. On small scales, CO<sub>2</sub> sources can be excluded more reliably than on larger scales. Moving to larger scales, CO<sub>2</sub> emissions, for example from power plants, could alter the ~~desired observed~~ CH<sub>4</sub> anomalies. One solution is to investigate the influence of CO<sub>2</sub> inhomogeneities by means of other types of measurements like in situ data as done in Krautwurst et al. (2017). The preferred option is, however, to use ~~another a different~~ gas with constant atmospheric concentration for normalization, such as O<sub>2</sub> (Schneising et al., 2009; Frankenberg et al., 2006), and to become independent

540 of a homogeneous CO<sub>2</sub> background. ~~For that, MAMAP also measures in the band at around 760 for normalization purposes, which will be investigated in future studies.~~

~~Since Deviations between observed fluxes and reported annual emissions are expected because~~ the emissions derived from the observed cross-sectional fluxes are ~~strictly speaking~~ only valid for the time of the overflight, and the amount of emitted CH<sub>4</sub> and the share between different ventilation shafts ~~are variable, deviations between observed fluxes and reported annual emissions are expected vary~~. Differences in the single cross-sectional fluxes measured on different days, which also capture the variability of the atmospheric transport, might reflect these circumstances. However, due to the large errors on single fluxes, these two effects could not be fully separated. Comparison between hourly emissions and averaged observed fluxes revealed excellent agreement for ‘cluster c’ and good agreement for ‘cluster b’ considering the uncertainties and effects ~~already~~ discussed in Sect. 4. Comparisons to annually reported emissions of single shafts or small clusters must be handled with caution and are hardly meaningful due to the high variability of the emissions. On larger scales, as for example ~~investigated in?~~ in Fiehn et al. (2020) who analyzed airborne in situ observations covering the entire basin, fluctuations of emissions from single shafts or even mines might cancel out.

## 6 Conclusions and summary

CH<sub>4</sub> emissions from coal mining activities are a significant contributor to anthropogenic greenhouse gas emissions and their accurate quantification is an essential step ~~on the way~~ to meet the emission reductions agreed on in the Paris agreement, which is part of the United Nations Framework Convention on Climate Change (UNFCCC, 2015). It addresses greenhouse gas emissions mitigation, adaptation, and finance. Consequently, an important motivation and research question for the multi-instrument and multi-platform campaign CoMet was how well CH<sub>4</sub> emissions from one of the largest coal mining areas in Europe can be quantified.

560 The passive airborne remote sensing instrument MAMAP acquired observations during six flights on five days between 28 May and 7 June 2018. The CH<sub>4</sub> column anomalies along the flight track were derived using the WFM-DOAS algorithm. These anomalies were combined with estimates of the wind speed and direction from three wind lidar stations, distributed in the USCB as part of the CoMet ground infrastructure, in a mass balance approach to compute cross-sectional fluxes. In total, based on the MAMAP observations, CH<sub>4</sub> emissions originating from four clusters comprising 23 ventilation shafts were studied and 565 successfully disentangled. Due to different positions of the flight tracks on different days, ~~even~~ smaller groups of shafts from each cluster could be investigated as well. Therefore, the four clusters were split into seven sub-clusters, excluding sub-clusters with only a single overflight, for analysis purposes.

Estimated averaged fluxes range over almost one order of magnitude from about 1 to 9 t CH<sub>4</sub> hr<sup>-1</sup> with standard errors of about 15 % to 59 %, whereby fluxes from single overflights of one (sub-) cluster deviated by up to 50 % from the averaged 570 flux. The most important error sources are the accuracy of the CH<sub>4</sub> anomaly retrieval of ~0.10 % relative to the background column, the choice of the background area, and the error in wind speed and wind direction estimated to be ~1 m s<sup>-1</sup> and ~10°, respectively, in most cases. In extreme cases, when wind speed and direction were low or variable, the ~~magnitude of the error~~

~~was similar to the magnitude for the error was as high as the~~ retrieved emission. However, wind speeds were usually around 5 to 6 m s<sup>-1</sup>, which appears to be a favourable magnitude for estimating reliable fluxes with magnitudes larger than 1 t CH<sub>4</sub> hr<sup>-1</sup>.  
575 It is recommended that these conditions are targeted during flight planning for future campaigns if remote sensing instruments with a similar sensitivity as that of MAMAP are deployed. An additional source of error originated from atmospheric variability due to turbulence or other sources of ~~the~~ variation of the atmospheric air flow, preventing flux estimates from single overflights. ~~It is~~ This error can be reduced by averaging over multiple overflights. Targeting the same emission source more than once should therefore also be an essential part of flight ~~planing~~ planning activities.

580 ~~The wind observations from the lidar stations were also compared to wind fields from WRF v3.9.1.1 model simulations to further investigate the wind situation in the USCB on flight days. Wind lidar observations and modeled wind fields agree well, except for one of the days with low wind conditions.~~

In the USCB region, the emissions of CH<sub>4</sub> from ventilation shafts can significantly fluctuate from day to day and even from hour to hour, as discussed in the example of single Pniówek shafts with variations of up to 70 % based on on-site  
585 measurements. As a result, observed fluxes could substantially deviate from reported annual values. Therefore, comparison of CH<sub>4</sub> fluxes derived from different types of observations requires data acquisition at the same time. Additionally, observed fluxes should only be compared to hourly resolved data to capture the variability correctly. Where hourly data were available, they agreed with the observed fluxes. This emphasizes the need for hourly resolved inventories of anthropogenic emissions to improve top-down and bottom-up comparisons. Overall, the ventilation shafts investigated by MAMAP (excluding shafts only  
590 investigated during a single overflight) account for around 40 % of the CH<sub>4</sub> mining emissions in the USCB when compared with the annual emissions in the ~~CoMetv3~~ CoMet ED v4 inventory.

Although the 1D MAMAP remote sensing instrument succeeded in estimating emissions of multiple clusters of ventilation shafts, a further breakdown into individual shafts requires a substantial increase in observations. Imaging instruments measuring multiple ground scenes simultaneously during ~~one~~ each time step will resolve this issue in the future.

595 *Data availability.* The MAMAP CH<sub>4</sub> column anomalies, the observations from the Leosphere Windcube 200S wind lidar systems, and the 3D WRF v3.9.1.1 reanalysis data simulations, are available from the authors upon request. The CoMet ED v4 emission inventory can be directly acquired from the ICOS Carbon Portal (<https://meta.icos-cp.eu/objects/4YLOpOtT0keMUckH1MrhxZZW>). The airborne in situ measurements acquired by the DLR Cessna, the FUB Cessna and the DLR HALO aircraft can be directly inquired from the authors or can be downloaded from the HALO database (<https://halo-db.pa.op.dlr.de/>).

600 *Special issue statement.* This article is part of the special issue "CoMet: a mission to improve our understanding and to better quantify the carbon dioxide and methane cycles". It is not associated with a conference.

## Appendix A

### A1 The WFM-DOAS retrieval

#### A1.1 Algorithm description

605 For the retrieval of the desired CH<sub>4</sub> column anomalies, the WFM-DOAS algorithm (Krings et al., 2011) is applied as introduced in Sect. 2.2.1. It uses simulated radiances, which are representative of the real atmosphere at the time and location of the observation and are compared to the measured spectra. Deviations between the two, which may occur due to enhanced methane in the measurement emitted by a ventilation shaft, are then captured by scaling weighting functions. A weighting function describes the change of radiance due to a change of a selected atmospheric parameter (e.g., changing atmospheric  
610 concentrations of CH<sub>4</sub> and CO<sub>2</sub>).

To simulate a reliable background model, i.e. a spectrum which is representative for the real atmosphere, and corresponding weighting functions, the model needs to be provided with several parameters that influence the simulated spectrum. In the case of the MAMAP instrument working between 1590 and 1690 nm, these are primarily vertical concentration profiles of CH<sub>4</sub>, CO<sub>2</sub> and also water vapour (H<sub>2</sub>O), complemented by pressure and temperature profiles. As backscattered solar radiation  
615 from the surface is measured, the spectrum is also influenced by the surface spectral reflectance and by scattering effects from aerosols in the atmosphere. Also geometrical parameters like flight altitude, surface elevation and solar zenith angle are taken into account.

As these parameters change from flight to flight, they are adapted to the prevailing conditions and radiative transfer model (RTM) simulations are performed for each flight. Furthermore, a 2D look-up table approach is used to account for strong  
620 variations in the light path due to changing surface elevation and solar zenith angle along the flight track. The relevant input parameters are listed in Table A1. The radiances as well as the weighting functions, which are then used as input for the WFM-DOAS retrieval, are calculated by the radiative transfer model SCIATRAN (Rozanov et al., 2014).

The retrieval yields profile scaling factors (PSFs) for the desired trace gas concentrations of CH<sub>4</sub> and CO<sub>2</sub>, from which the CH<sub>4</sub> column anomalies are then computed as follows:

$$625 \quad \Delta V_{\text{CH}_4} = \left( \frac{\text{PSF}_{\text{ratio}}}{\text{PSF}_{\text{ratio}}} - 1 \right) \cdot \text{CH}_4^{\text{abs col}} \cdot k \quad (\text{A1})$$

with

$$\text{PSF}_{\text{ratio}} = \frac{\text{PSF}_{\text{CH}_4}}{\text{PSF}_{\text{CO}_2}}, \quad (\text{A2})$$

where  $\Delta V_{\text{CH}_4}$  is the CH<sub>4</sub> column anomaly in molec cm<sup>-1</sup> used in the cross-sectional flux method (Eq. (1)),  $k$  is a conversion factor without units derived from averaging kernels and takes into account that the sensitivity below the aircraft is around twice  
630 as high than above,  $\text{CH}_4^{\text{abs col}}$  is the assumed background column of CH<sub>4</sub> in molec cm<sup>-1</sup>,  $\text{PSF}_{\text{CH}_4}$  and  $\text{PSF}_{\text{CO}_2}$  are the retrieved

**Table A1.** General boundary conditions for the six flights performed during CoMet and also used for the radiative transfer model (RTM) simulations.

| Flight day                                         | 28.05.2018 | 29.05.2018 | 01.06.2018 | 06.06.2018 | 06.06.2018 | 07.06.2018 |
|----------------------------------------------------|------------|------------|------------|------------|------------|------------|
| Flight time appr. (local time)                     |            |            |            |            |            |            |
| start [hh:mm]                                      | 10:33      | 10:17      | 09:07      | 09:31      | 14:17      | 09:09      |
| end [hh:mm]                                        | 13:02      | 12:50      | 12:03      | 12:26      | 17:12      | 11:58      |
| Solar zenith angle (SZA) <sup>a)</sup>             |            |            |            |            |            |            |
| min [°]                                            | 28.0       | 28.1       | 28.8       | 27.6       | 32.8       | 28.8       |
| max [°]                                            | 39.3       | 40.9       | 50.9       | 46.8       | 58.4       | 51.1       |
| Flight altitude [m a.s.l.] <sup>b)</sup>           |            |            |            |            |            |            |
|                                                    | 3235       | 3205       | 3173       | 3143       | 3150       | 3160       |
| Surface elevation along flight track <sup>c)</sup> |            |            |            |            |            |            |
| min [m]                                            | 113        | 112        | 119        | 109        | 109        | 110        |
| max [m]                                            | 436        | 427        | 427        | 471        | 475        | 464        |
| Mean column mole fractions <sup>d)</sup>           |            |            |            |            |            |            |
| CH <sub>4</sub> [ppb]                              | 1835       | 1839       | 1833       | 1836       | 1834       | 1841       |
| CO <sub>2</sub> [ppm]                              | 401.7      | 407.3      | 400.2      | 408.3      | 408.3      | 408.3      |
| H <sub>2</sub> O [ppm]                             | 4166       | 3140       | 4508       | 2517       | 2148       | 2941       |
| Aerosol scenario <sup>e)</sup> [–]                 |            |            | urban      |            |            |            |
| Albedo <sup>f)</sup> [–]                           |            |            | 0.18       |            |            |            |

<sup>a)</sup> SZA is computed from the GPS (Global Positioning System) time stamp and assigned to each observation.

<sup>b)</sup> Flight altitude is computed as average over the entire flight from the GPS signal.

<sup>c)</sup> Topography data is obtained from the Shuttle Radar Topography Mission (SRTM, Farr et al., 2007, version 2.1, [http://dds.cr.usgs.gov/srtm/version2\\_1/](http://dds.cr.usgs.gov/srtm/version2_1/)) digital elevation model, which is assigned to each observation based on its current GPS position.

<sup>d)</sup> The vertical atmospheric profiles are based on the U.S. standard atmosphere (USCESA, 1976), which are then adapted according to the airborne in situ observations (CH<sub>4</sub> and CO<sub>2</sub>) acquired by the DLR Cessna, the FUB Cessna and the DLR HALO aircraft and the WRF-CHEM v3.9.1.1 model simulations (H<sub>2</sub>O).

<sup>e)</sup> As aerosol scenario, a standard OPAC (Optical Properties of Aerosol and Clouds, Hess et al., 1998) urban aerosol scenario is applied.

<sup>f)</sup> The surface is assumed as a Lambertian reflector with a constant and wavelength independent surface spectral reflectance in nadir direction of 0.18, which is a common value for mid latitude vegetation and also used in previous studies (e.g. Krings et al., 2011).

profile scaling factors without units, and  $\overline{\text{PSF}}_{\text{ratio}}$  denotes a normalization process with observations from the local background. The formulas including the different quantities are further discussed below.

The retrieved PSFs of CH<sub>4</sub> and CO<sub>2</sub> describe the relative change in CH<sub>4</sub> and CO<sub>2</sub> in the measured spectra compared to the simulated one. If the observation was acquired over a CH<sub>4</sub> emission plume, the PSF<sub>CH<sub>4</sub></sub> is >1 and the PSF<sub>CO<sub>2</sub></sub> remains 1. However, the PSFs are not only influenced by the respective trace gas concentrations in the atmosphere but also by light path changes resulting from, e.g., variations in flight altitude, surface elevation or enhanced scattering, not perfectly covered by the RTM simulations. These light path errors affect the absorption behaviour of both gases in a similar way due to their spectral proximity and can, therefore, be significantly reduced by applying the CH<sub>4</sub> over CO<sub>2</sub> proxy method (Krings et al.,

2013, 2011) denoted by Eq. (A2). The drawback of this method is, however, that strong CO<sub>2</sub> sources must not be located in  
640 the measurement area and the CO<sub>2</sub> concentration remains constant during one flight, which is true on smaller scales like single  
shafts or small clusters of shafts, but might be invalid if the entire USCB is investigated. Finally, the PSF ratios are normalized  
by the local background (denoted by  $\overline{\text{PSF}_{\text{ratio}}}$  in Eq. (A1)) and corrected by the conversion factor  $k$  to get the desired CH<sub>4</sub>  
column anomalies needed for the cross-sectional flux method. The local background is defined similarly to how it has been  
645 done in other publications (e.g., Krings et al., 2018; Krautwurst et al., 2017; Frankenberg et al., 2016) as observations outside  
of a plume in its flanks and determined by visual inspection of each single track downwind of a potential source (cluster).

## A1.2 Errors

Errors in the retrieval of the CH<sub>4</sub> column anomalies originate from the measurement noise of the instrument or the input  
parameters for the RTM simulations. The measurement noise is computed as single measurement precision relative to the  
background column directly from the scatter of the measured data. The retrieval described above is applied and the observations,  
650 which are not influenced by a CH<sub>4</sub> plume, are used. For the currently investigated data set, this has been estimated to be 0.22 %  
relative to the background column on average.

The sensitivity of the input parameters on the final CH<sub>4</sub> column anomaly is estimated by using synthetic spectra while  
varying the input parameters according to their typical variation during a flight as given in Table A2. As expected and already  
shown in earlier studies (e.g., Krings et al., 2011), the deviations in the fitted profile scaling factors easily reach some percent  
655 and, therefore, are on the same order of magnitude as those caused by actual emissions. As most of the deviations are related to  
light path errors, the applied proxy method reduces these deviations significantly. Most of the remaining effects are systematic  
and constant along a flight track (e.g., a constant offset caused by wrongly assumed CO<sub>2</sub> or CH<sub>4</sub> background concentration,  
background temperature or background aerosol profiles), and are corrected by the normalization using observations outside  
of a plume. Parameters which may not be covered by the normalization process, but also do not fluctuate randomly along a  
660 flight track and therefore may not be entirely covered by the computed single measurement precision, are surface elevation  
and surface spectral reflectance. In a worst case scenario, part of the flight track is located over an especially bright surface or  
over relatively high terrain (forest vs. rangeland) compared to the remaining track. In this study, the uncertainties originating  
from these two factors are therefore assumed to be uncorrelated and after accounting for the conversion factor  $k$  (~0.69), they  
potentially lead to a systematic offset of the retrieved CH<sub>4</sub> column anomaly of around 0.10 %.

665 In combination with the single measurement precision, they are considered in the column anomaly computation by Eq. (1).  
Although the values in Table A2 are computed for the flight on 7 June, they are assumed to be valid also for the other days.

**Table A2.** Sensitivity of the retrieved profile scaling factors (PSFs) to the input parameters for the radiative transfer model (RTM) simulations according to expected variations during one flight on 7 June. The deviations for the PSFs of CH<sub>4</sub>, CO<sub>2</sub> and the ratio CH<sub>4</sub> over CO<sub>2</sub> are again given relative to the background column. The parameters for the true or basic scenario are listed in Table A1, 7 June using a flight altitude of 3.16 km and a solar zenith angle of 39.4°. Not all values deviate symmetrically around 0%, therefore, the worst case scenario is always selected.

| variation in parameter               | Expected             |                 |            |
|--------------------------------------|----------------------|-----------------|------------|
|                                      | deviation of PSF [%] |                 |            |
|                                      | CH <sub>4</sub>      | CO <sub>2</sub> | ratio      |
| Solar zenith angle [ $\pm 2^\circ$ ] | $\pm 2.36$           | $\pm 2.29$      | $\pm 0.08$ |
| Surface elevation [ $\pm 30$ m]      | $\pm 0.60$           | $\pm 0.68$      | $\pm 0.08$ |
| Flight altitude [ $\pm 20$ m]        | $\pm 0.12$           | $\pm 0.12$      | $\pm 0.01$ |
| Aerosol [desert, background]         | $\pm 0.16$           | $\pm 0.45$      | $\pm 0.29$ |
| Albedo [0.05–0.50]                   | $\pm 0.68$           | $\pm 0.80$      | $\pm 0.12$ |
| H <sub>2</sub> O [ $\pm 50$ %]       | $\pm 0.03$           | $\pm 0.01$      | $\pm 0.02$ |
| CO <sub>2</sub> [ $\pm 1$ %]         | $\pm 0.00$           | $\pm 1.00$      | $\mp 1.00$ |
| CH <sub>4</sub> [ $\pm 1$ %]         | $\pm 1.00$           | $\pm 0.00$      | $\pm 1.00$ |
| Temperature [ $\pm 5^\circ$ C]       | $\pm 1.57$           | $\pm 1.88$      | $\pm 0.31$ |

## A2 Errors of the computed fluxes

The error  $\delta F_{\text{track}}$  of the flux  $F_{\text{track}}$  of one track is computed by root sum squaring the error sources introduced in Sect. 2.2.3:

$$\delta F_{\text{track}} = \sqrt{\delta F_u^2 + \delta F_\alpha^2 + \delta F_{\text{bg}}^2 + \delta F_{\text{col-pr}}^2(n) + \delta F_{\text{col-ac}}^2}, \quad (\text{A3})$$

670 where  $\delta F_u$ ,  $\delta F_\alpha$ ,  $\delta F_{\text{bg}}$ ,  $\delta F_{\text{col-pr}}$ ,  $\delta F_{\text{col-ac}}$  are the errors arising from the wind speed, from the wind direction, from the choice of  
the background observations, and the column anomaly precision and accuracy in  $\text{t CH}_4 \text{ hr}^{-1}$ .  $\delta F_u$  and  $\delta F_{\text{col-ac}}$  are computed by  
Gaussian error propagation of Eq. 1.  $\delta F_{\text{col-pr}}(n)$  is also calculated by Gaussian error propagation taking into account its random  
nature by dividing the value for the estimated precision by  $\sqrt{n}$ , where  $n$  is the number of observations within the plume.  
The wind direction modifies the flux via a cosine term and its error can thus not easily be calculated by error propagation.  
675 Consequently, we estimate  $\delta F_\alpha$  by varying the prevailing wind direction by its estimated error on a specific day and use the  
difference to the ‘true’ flux  $F_{\text{track}}$  as error estimate. The choice of the background observations is investigated by randomly  
selecting two-thirds of the observations from either side of the plume and computing a new background for one flight track,  
which is used to calculate a new flux estimate. This is done for up to 500 combinations for each side. The  $1-\sigma$  standard deviation  
of those fluxes is then used to estimate the error  $\delta F_{\text{bg}}$ .

680 An additional uncertainty source originates from variability in the atmospheric transport caused by turbulence and leading to  
varying cross-sectional fluxes if estimated from multiple overflights of the same source, which cannot be explained by source  
variability alone (e.g., Wolff et al., 2021; Krautwurst et al., 2017; Matheou and Bowman, 2016). This variability, expressed  
as  $\delta F_{\text{atm}}$ , is estimated as the  $1-\sigma$  standard deviation (STD) from the overflights themselves and is then combined with the  
error  $\delta F_{\text{tracks}}$ , resulting from the errors of the single tracks, to estimate the standard error ( $1-\sigma$ ) of the averaged flux if multiple  
685 overflights of the same source(s) are available:

$$\delta F = \sqrt{\delta F_{\text{tracks}}^2 + \delta F_{\text{atm}}^2}, \quad (\text{A4})$$

with

$$\delta F_{\text{tracks}} = \frac{\sqrt{\sum_{j=0}^m \delta F_{\text{track},j}^2}}{m}, \quad (\text{A5})$$

and

$$690 \delta F_{\text{atm}} = \frac{\text{STD}(F_{\text{track},j})}{\sqrt{m}} \quad (\text{A6})$$

where  $m$  is the number of flight tracks.



## Appendix B: Wind fields

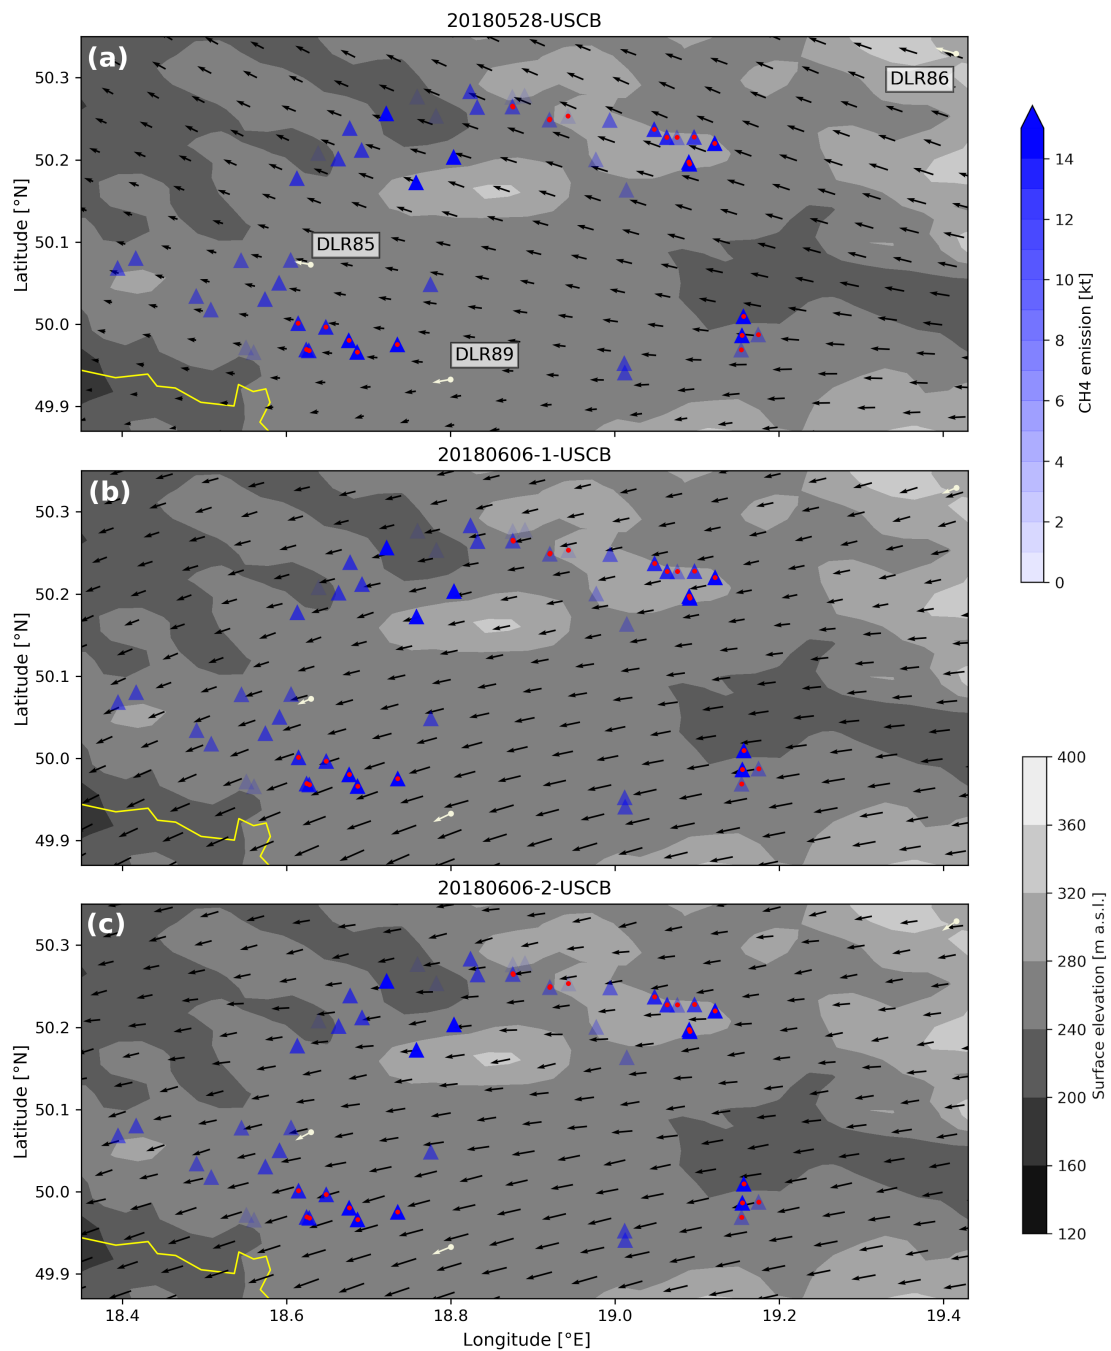

**Figure B1.** Similar to Fig. 4, but for the remaining three flights on 28 May (a), and 6 June in the morning (b) and in the afternoon (c).

## Appendix C: Column anomalies and fluxes of clusters a, b, c, and d

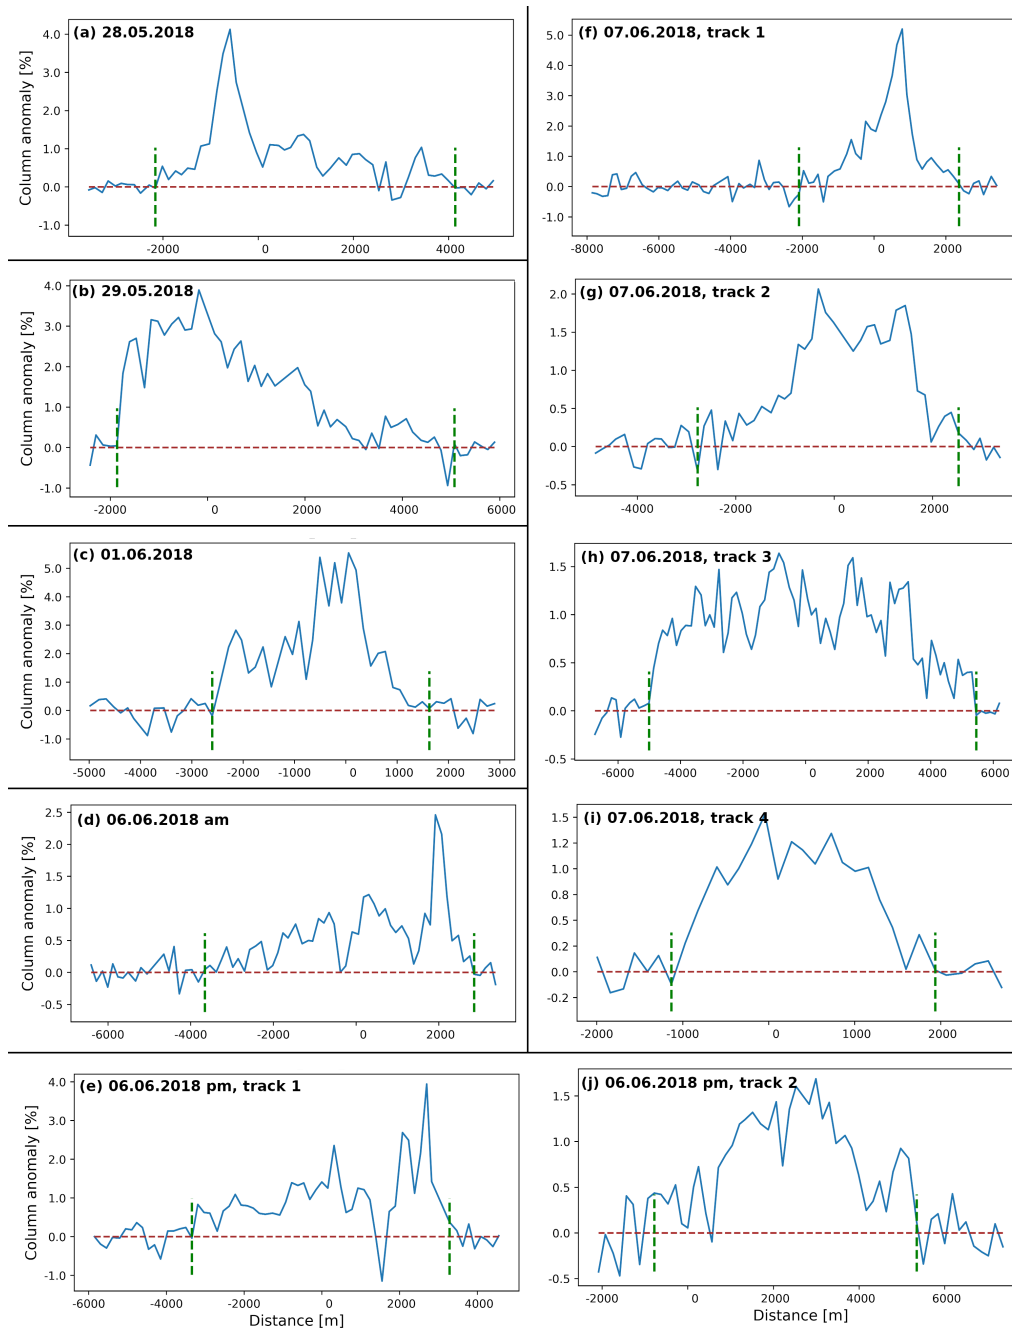

**Figure C1.**  $\text{CH}_4$  anomalies along the cross-sections downwind of ventilation shafts of 'cluster b' on the different flight days. Green vertical dashed lines separate the plume from the background area. 2D visualisation is shown in Fig. 5.

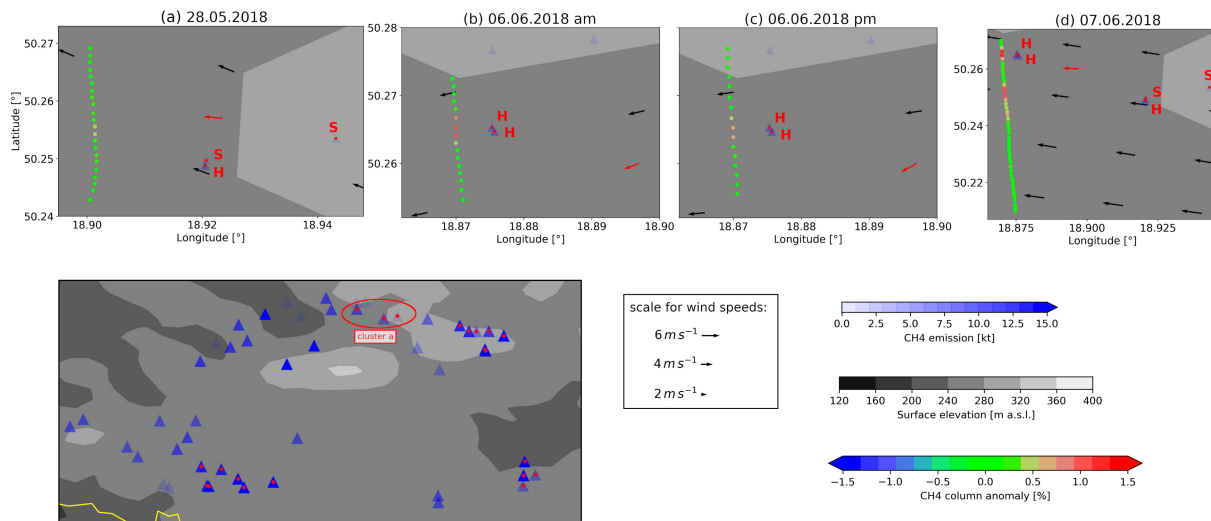

**Figure C2.** Same as Fig. 5 but for shaft 'cluster a' in the northern part of the study area (H: Halemba, S: Śląsk). The corresponding cross-sectional fluxes are summarized in Table C1 [and detailed cross-sections are found in Fig. C3.](#)

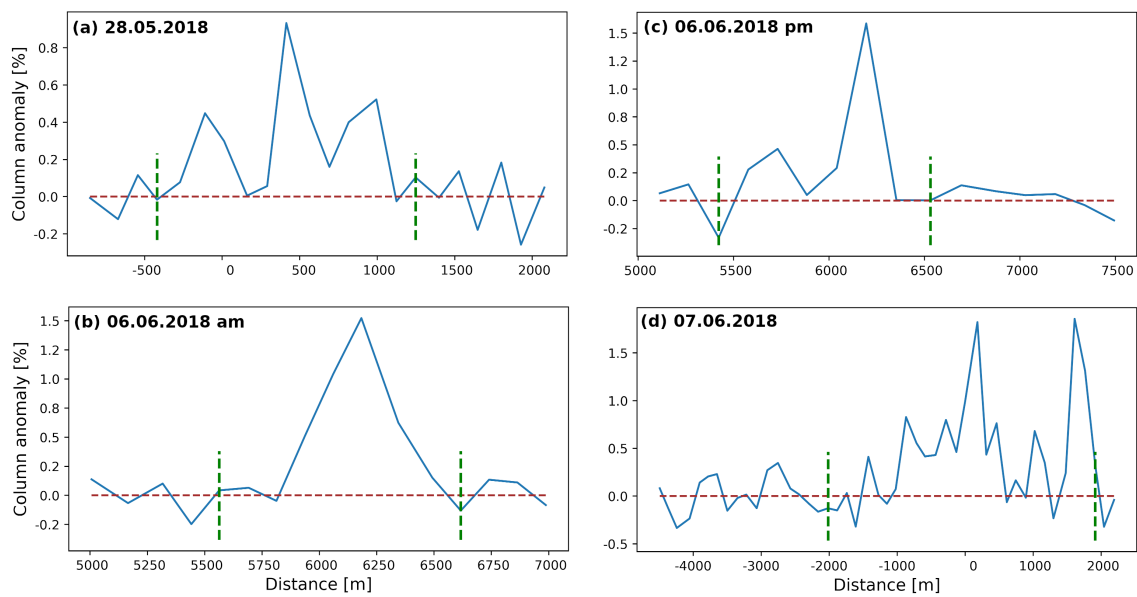

**Figure C3.** [Same as Fig. C1 but for shaft 'cluster a'. 2D visualisation is shown in Fig. C2.](#)

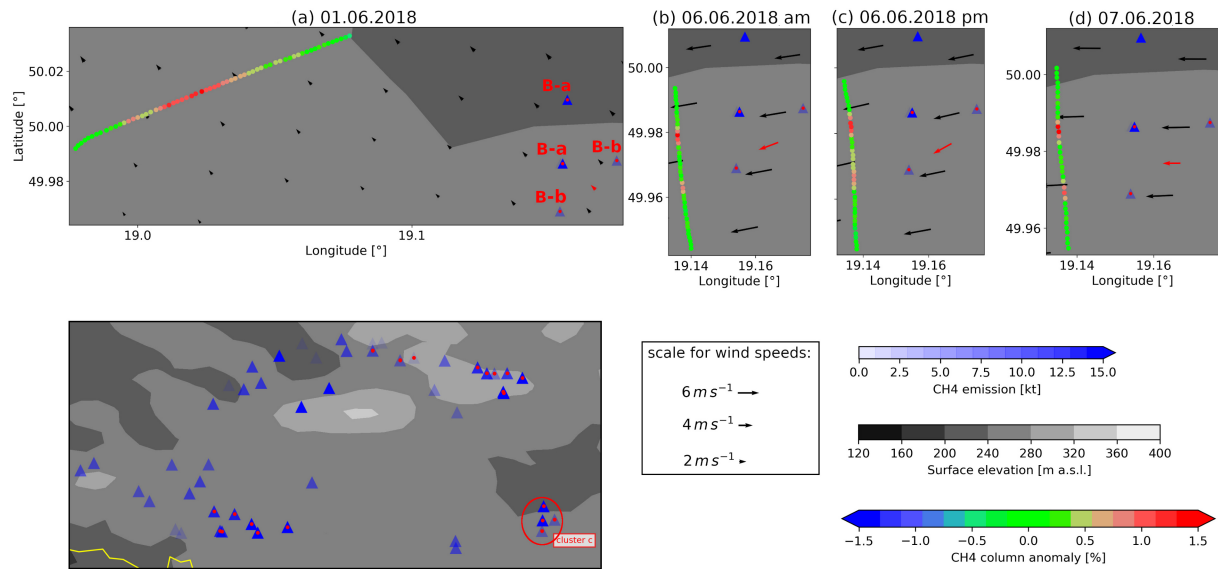

**Figure C4.** Same as Fig. 5 but for shaft 'cluster c' in the south-eastern part of the study area (B-a: Brzeszcze-a, B-b: Brzeszcze-b). The corresponding cross-sectional fluxes are summarized in Table C1 [and detailed cross-sections are found in Fig. C5.](#)

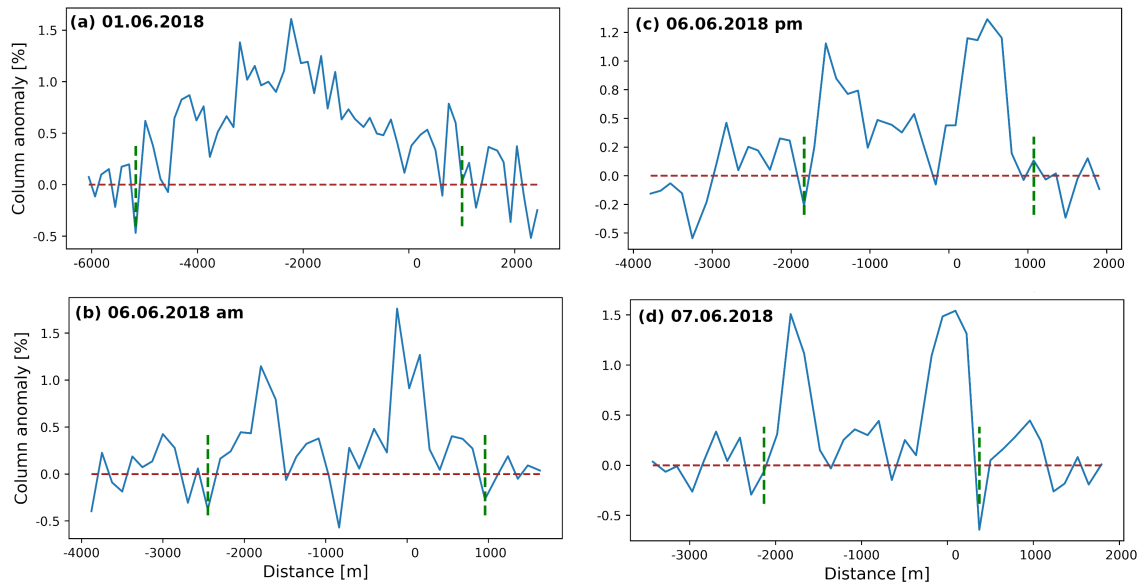

**Figure C5.** [Same as Fig. C1 but for shaft 'cluster c'. 2D visualisation is shown in Fig. C4.](#)

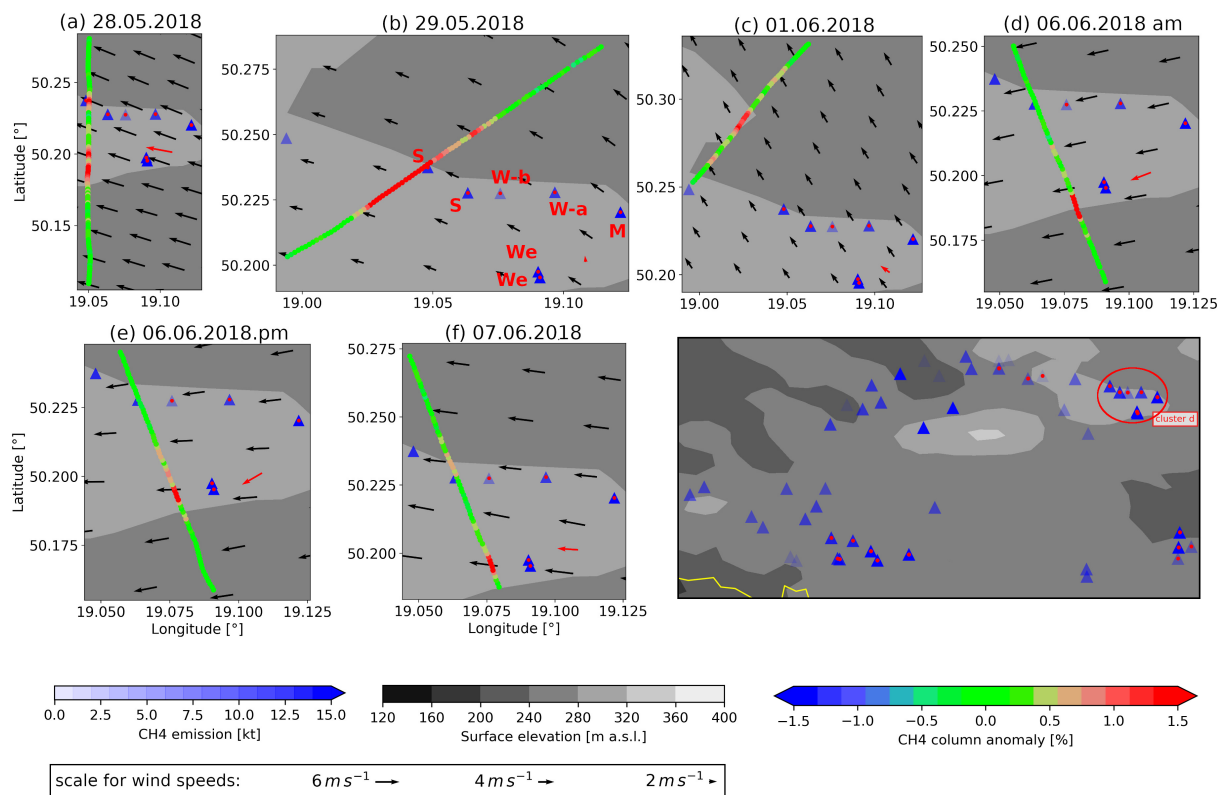

**Figure C6.** Same as Fig. 5 but for shaft <sup>2+</sup>'cluster d' in the north-eastern part of the study area (S: Staszic, W-b: Wieczorek-b, W-a: Wieczorek-a, M: Myslowice, We: Wesola). The corresponding cross-sectional fluxes are summarized in Table C1 [and detailed cross-sections are found in Fig. C7.](#)

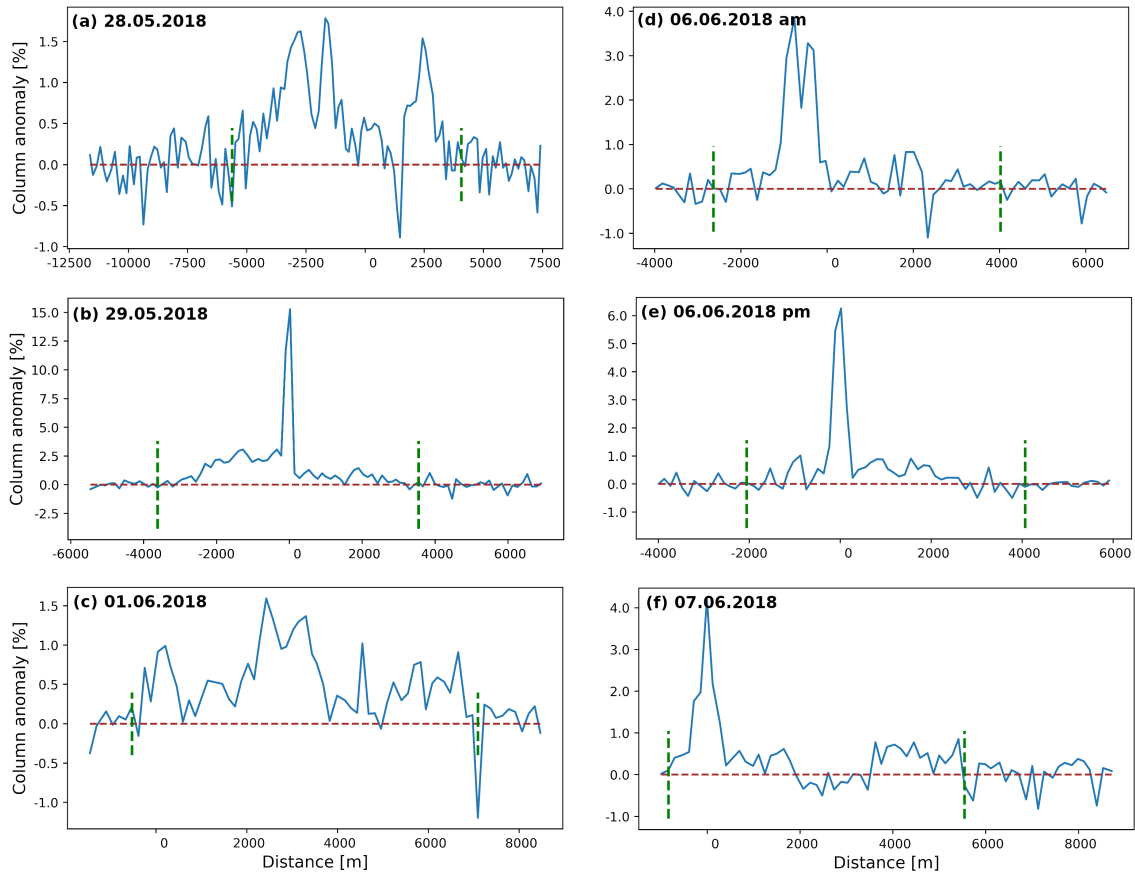

Figure C7. Same as Fig. C1 but for shaft 'cluster c'. 2D visualisation is shown in Fig. C6.

**Table C1.** Same as Table 2 but for <sup>a-f</sup>clusters a, c, d', and without the errors of the single components.

|                         | Cluster a                                  |                                          |                                |             | Cluster c                                  |                                           |                                |             | Cluster d                                    |                                            |                                |             |
|-------------------------|--------------------------------------------|------------------------------------------|--------------------------------|-------------|--------------------------------------------|-------------------------------------------|--------------------------------|-------------|----------------------------------------------|--------------------------------------------|--------------------------------|-------------|
|                         | Flux                                       |                                          | Wind                           |             | Flux                                       |                                           | Wind                           |             | Flux                                         |                                            | Wind                           |             |
|                         | HS <sup>a)</sup><br>[ t hr <sup>-1</sup> ] | H <sup>b)</sup><br>[ m s <sup>-1</sup> ] | speed<br>[ m s <sup>-1</sup> ] | dir.<br>[°] | B1 <sup>c)</sup><br>[ t hr <sup>-1</sup> ] | B2 <sup>d)</sup><br>[ m s <sup>-1</sup> ] | speed<br>[ m s <sup>-1</sup> ] | dir.<br>[°] | WSMW <sup>e)</sup><br>[ t hr <sup>-1</sup> ] | WMW <sup>f)</sup><br>[ m s <sup>-1</sup> ] | speed<br>[ m s <sup>-1</sup> ] | dir.<br>[°] |
| 28 May                  | 1.0                                        |                                          | 6.3                            | 95          |                                            |                                           |                                |             | 13.7                                         |                                            | 6.7                            | 101         |
| 29 May                  |                                            |                                          |                                |             |                                            |                                           |                                |             | 4.9                                          |                                            | 1.6                            | 173         |
| 01 June                 |                                            |                                          |                                |             | 2.8                                        |                                           | 1.9                            | 134         | 4.3                                          |                                            | 2.9                            | 126         |
| 06 June, am             |                                            | 0.9                                      | 5.4                            | 69          |                                            | 2.8                                       | 5.9                            | 69          |                                              | 7.3                                        | 5.5                            | 69          |
| 06 June, pm             |                                            | 0.8                                      | 6.0                            | 61          |                                            | 3.1                                       | 5.9                            | 61          |                                              | 7.0                                        | 5.8                            | 60          |
| 07 June                 | 2.1                                        | 1.1                                      | 5.3                            | 93          |                                            | 2.7                                       | 5.0                            | 89          |                                              | 5.4                                        | 5.2                            | 94          |
| Mean                    | <b>1.6</b>                                 | <b>1.0</b>                               |                                |             | 2.8*                                       | <b>2.9</b>                                |                                |             | <b>7.6</b>                                   | <b>6.5</b>                                 |                                |             |
| Error                   |                                            |                                          |                                |             |                                            |                                           |                                |             |                                              |                                            |                                |             |
| [ t hr <sup>-1</sup> ]  | 0.7                                        | 0.2                                      |                                |             | 2.9                                        | 0.5                                       |                                |             | 3.5                                          | 1.2                                        |                                |             |
| [%]                     | 42                                         | 22                                       |                                |             | 103                                        | 19                                        |                                |             | 46                                           | 19                                         |                                |             |
| Inventory               |                                            |                                          |                                |             |                                            |                                           |                                |             |                                              |                                            |                                |             |
| [ kt yr <sup>-1</sup> ] | 4.9                                        | 7.8                                      |                                |             | 56                                         | 32                                        |                                |             | 99                                           | 73                                         |                                |             |
| [ t hr <sup>-1</sup> ]  | <b>0.6</b>                                 | <b>0.9</b>                               |                                |             | 6.4                                        | <b>3.7</b>                                |                                |             | <b>11.3</b>                                  | <b>8.4</b>                                 |                                |             |

\*based on only one single overflight.

<sup>a)</sup>Halemba (1), Śląsk (2).      <sup>b)</sup>Halemba (2).

<sup>c)</sup>Brzeszcze-a,-b (2,2).      <sup>d)</sup>Brzeszcze-a,-b (1,2).

<sup>e)</sup>Wesoła (2), Staszic (2), Mystowice (1), Wieczorek-a,-b (1,1).      <sup>f)</sup>Wesoła (2), Mystowice (1), Wieczorek-a,-b (1,1).

*Author contributions.* SK processed the remote sensing (RS) data and analyzed the RS and wind lidar data and data from the WRF-CHEM v3.9.1.1 model simulations, computed the fluxes, and led the writing of the manuscript. KG, JB, HB and JPB contributed to the paper draft. KG, AnF, HB, and JPB initialized the CoMet activities including the campaign in 2018. SK, KG, JB, MG, AIF, AR, TR, CG, AnF, and HB designed the daily flight plans. SK, KG, and JB collected the remote sensing and in-situ data needed for processing of the RS data. MG, AIF, AR, CG, and AnF collected in-situ data needed for processing of the RS data. NW collected and processed the wind lidar data. MG and JM performed the WRF-CHEM v3.9.1.1 model simulations. MG, JS, and JN supplied and interpreted data from the CoMet v4 inventory. All authors contributed to the interpretation of the results and the improvement of the manuscript.

*Competing interests.* The authors declare that they have no conflict of interest.

*Acknowledgements.* We gratefully acknowledge funding for the CoMet campaign by the BMBF (German Federal Ministry of Education and Research) through AIRSPACE (FK 01LK1701B and FK 390 01LK1701C), the State of Bremen, and the MPG (Max Planck Society). The work has further been supported by the German Research Foundation (Deutsche Forschungsgemeinschaft, DFG) within the DFG Priority Program (SPP 1294) Atmospheric and Earth System Research with the Research Aircraft HALO (High Altitude and LOng Range Research Aircraft) under grant BO 1731/1-1. We also acknowledge the use of resources of Deutsches Klimarechnungszentrum (DKRZ), namely the high-performance cluster Mistral, for data storage and analysis.

We also gratefully thank Jeremy Gordon who safely piloted the FUB Cessna during the different flights and the administration of the airport Katowice, who not only provided us with a parking space for the aircraft and gave us easy access to the hanger to service our measuring instruments during the campaign, but also took care of our physical well-being before and after the flights.



## References

- Alexe, M., Bergamaschi, P., Segers, A., Detmers, R., Butz, A., Hasekamp, O., Guerlet, S., Parker, R., Boesch, H., Frankenberg, C., Scheepmaker, R. A., Dlugokencky, E., Sweeney, C., Wofsy, S. C., and Kort, E. A.: Inverse modelling of CH<sub>4</sub> emissions for 2010–2011 using different satellite retrieval products from GOSAT and SCIAMACHY, *Atmospheric Chemistry and Physics*, 15, 113–133, <https://doi.org/10.5194/acp-15-113-2015>, 2015.
- 715 Amediek, A., Ehret, G., Fix, A., Wirth, M., Büdenbender, C., Quatrevalet, M., Kiemle, C., and Gerbig, C.: CHARM-F – a new airborne integrated-path differential-absorption lidar for carbon dioxide and methane observations: measurement performance and quantification of strong point source emissions, *Appl. Opt.*, 56, 5182–5197, <https://doi.org/10.1364/AO.56.005182>, 2017.
- Buchwitz, M., Schneising, O., Reuter, M., Heymann, J., Krautwurst, S., Bovensmann, H., Burrows, J. P., Boesch, H., Parker, R. J., Somkuti, P., Detmers, R. G., Hasekamp, O. P., Aben, I., Butz, A., Frankenberg, C., and Turner, A. J.: Satellite-derived methane hotspot emission estimates using a fast data-driven method, *Atmospheric Chemistry and Physics*, 17, 5751–5774, <https://doi.org/10.5194/acp-17-5751-2017>, 2017.
- 720 Cambaliza, M. O. L., Shepson, P. B., Bogner, J., Caulton, D. R., Stirm, B., Sweeney, C., Montzka, S. A., Gurney, K. R., Spokas, K., Salmon, O. E., Lavoie, T. N., Hendricks, A., Mays, K., Turnbull, J., Miller, B. R., Lauvaux, T., Davis, K., Karion, A., Moser, B., Miller, C., Obermeyer, C., Whetstone, J., Prasad, K., Miles, N., and Richardson, S.: Quantification and source apportionment of the methane emission flux from the city of Indianapolis, *Elementa: Science of the Anthropocene*, 3, 000 037, <https://doi.org/10.12952/journal.elementa.000037>, 2015.
- 725 Conley, S., Faloona, I., Mehrotra, S., Suard, M., Lenschow, D. H., Sweeney, C., Herndon, S., Schwietzke, S., Pétron, G., Pifer, J., Kort, E. A., and Schnell, R.: Application of Gauss's theorem to quantify localized surface emissions from airborne measurements of wind and trace gases, *Atmospheric Measurement Techniques*, 10, 3345–3358, <https://doi.org/10.5194/amt-10-3345-2017>, 2017.
- 730 Crippa, M., Solazzo, E., Huang, G., Guizzardi, D., Koffi, E., Muntean, M., Schieberle, C., Friedrich, R., and Janssens-Maenhout, G.: High resolution temporal profiles in the Emissions Database for Global Atmospheric Research (EDGAR), *Nature Scientific Data*, <https://doi.org/https://doi.org/10.1038/s41597-020-0462-2>, 2020.
- Dlugokencky, E. J., Nisbet, E. G., Fisher, R., and Lowry, D.: Global atmospheric methane: budget, changes and dangers, *Philosophical Transactions of the Royal Society of London A: Mathematical, Physical and Engineering Sciences*, 369, 2058–2072, <https://doi.org/10.1098/rsta.2010.0341>, 2011.
- 735 EPA: U.S. Environmental Protection Agency: Global Anthropogenic Non-CO<sub>2</sub> Greenhouse Gas Emissions: 1990–2030, available at <https://www.epa.gov/global-mitigation-non-co2-greenhouse-gases/global-non-co2-ghg-emissions-1990-2030>, last access: 27.05.2020, 2012.
- Etminan, M., Myhre, G., Highwood, E. J., and Shine, K. P.: Radiative forcing of carbon dioxide, methane, and nitrous oxide: A significant revision of the methane radiative forcing, *Geophysical Research Letters*, 43, 12,614–12,623, <https://doi.org/10.1002/2016gl071930>, 2016.
- 740 Farr, T. G., Rosen, P. A., Caro, E., Crippen, R., Duren, R., Hensley, S., Kobrick, M., Paller, M., Rodriguez, E., Roth, L., Seal, D., Shaffer, S., Shimada, J., Umland, J., Werner, M., Oskin, M., Burbank, D., and Alsdorf, D.: The Shuttle Radar Topography Mission, *Reviews of Geophysics*, 45, <https://doi.org/10.1029/2005RG000183>, data available at [https://dds.cr.usgs.gov/srtm/version2\\_1/](https://dds.cr.usgs.gov/srtm/version2_1/), last access: 15.06.2017, 2007.
- 745 Fesenfeld, L. P., Schmidt, T. S., and Schrode, A.: Climate policy for short- and long-lived pollutants, *Nature Climate Change*, 8, 933–936, <https://doi.org/10.1038/s41558-018-0328-1>, 2018.

- Fiehn, A., Kostinek, J., Eckl, M., Klausner, T., Gałkowski, M., Chen, J., Gerbig, C., Röckmann, T., Maazallahi, H., Schmidt, M., Korbeń, P., Nečki, J., Jagoda, P., Wildmann, N., Mallaun, C., Bun, R., Nickl, A.-L., Jöckel, P., Fix, A., and Roiger, A.: Estimating CH<sub>4</sub>, CO<sub>2</sub> and CO emissions from coal mining and industrial activities in the Upper Silesian Coal Basin using an aircraft-based mass balance approach, *Atmospheric Chemistry and Physics*, pp. 12 675–12 695, <https://doi.org/10.5194/acp-20-12675-2020>, 2020.
- 750 Fix, A. and The CoMet Team: CoMet: An airborne mission to simultaneously measure CO<sub>2</sub> and CH<sub>4</sub> using lidar, passive remote sensing, and in-situ techniques, *Atmos. Meas. Tech.*, in preparation, 2021.
- Fix, A., Amediek, A., Buedenbender, C., Ehret, G., Quatrevalet, M., Wirth, M., Loehring, J., Kasemann, R., Klein, J., Hoffmann, H.-D., and Klein, V.: Development and First Results of a new Near-IR Airborne Greenhouse Gas Lidar, in: *Advanced Solid State Lasers*, OSA, <https://doi.org/10.1364/assl.2015.ath1a.2>, 2015.
- 755 Franco, B., Mahieu, E., Emmons, L. K., Tzompa-Sosa, Z. A., Fischer, E. V., Sudo, K., Bovy, B., Conway, S., Griffin, D., Hannigan, J. W., Strong, K., and Walker, K. A.: Evaluating ethane and methane emissions associated with the development of oil and natural gas extraction in North America, *Environmental Research Letters*, 11, 044 010, <https://doi.org/10.1088/1748-9326/11/4/044010>, 2016.
- Frankenberg, C., Meirink, J. F., Bergamaschi, P., Goede, A. P. H., Heimann, M., Koerner, S., Platt, U., van Weele, M., and Wagner, T.: Satellite cartography of atmospheric methane from SCIAMACHY on board ENVISAT: Analysis of the years 2003 and 2004, *Journal of Geophysical Research*, 111, <https://doi.org/10.1029/2005jd006235>, 2006.
- 760 Frankenberg, C., Thorpe, A. K., Thompson, D. R., Hulley, G., Kort, E. A., Vance, N., Borchardt, J., Krings, T., Gerilowski, K., Sweeney, C., Conley, S., Bue, B. D., Aubrey, A. D., Hook, S., and Green, R. O.: Airborne methane remote measurements reveal heavy-tail flux distribution in Four Corners region, *Proceedings of the National Academy of Sciences*, 113, 9734–9739, <https://doi.org/10.1073/pnas.1605617113>, 2016.
- 765 Gałkowski, M., Fiehn, A., Swolkien, J., Stanisavljevic, M., Korben, P., Menoud, M., Necki, J., Roiger, A., Röckmann, T., Gerbig, C., and Fix, A.: Emissions of CH<sub>4</sub> and CO<sub>2</sub> over the Upper Silesian Coal Basin (Poland) and its vicinity, <https://doi.org/10.18160/3K6Z-4H73>, <https://meta.icos-cp.eu/objects/4YLOpOtT0keMUckH1MrhxZZW>, 2021.
- Gałkowski, M., Jordan, A., Rothe, M., Marshall, J., Koch, F.-T., Chen, J., Agusti-Panareda, A., Fix, A., and Gerbig, C.: In situ observations of greenhouse gases over Europe during the CoMet 1.0 campaign aboard the HALO aircraft, *Atmospheric Measurement Techniques*, 14, 1525–1544, <https://doi.org/10.5194/amt-14-1525-2021>, 2021.
- 770 Galkowski et al.: WRF-GHG Simulations of greenhouse gas distribution over Europe during CoMet Mission, in preparation, 2021.
- Gerilowski, K., Tretner, A., Krings, T., Buchwitz, M., Bertagnolio, P. P., Belemzov, F., Erzinger, J., Burrows, J. P., and Bovensmann, H.: MAMAP - a new spectrometer system for column-averaged methane and carbon dioxide observations from aircraft: instrument description and performance analysis, *Atmospheric Measurement Techniques*, 4, 215–243, <https://doi.org/10.5194/amt-4-215-2011>, 2011.
- 775 Gerilowski, K., Krings, T., Hartmann, J., Buchwitz, M., Sachs, T., Erzinger, J., Burrows, J. P., and Bovensmann, H.: Atmospheric remote sensing constraints on direct sea-air methane flux from the 22/4b North Sea massive blowout bubble plume, *Marine and Petroleum Geology*, 68, 824–835, <https://doi.org/10.1016/j.marpetgeo.2015.07.011>, 2015.
- Gordon, M., Li, S.-M., Staebler, R., Darlington, A., Hayden, K., O'Brien, J., and Wolde, M.: Determining air pollutant emission rates based on mass balance using airborne measurement data over the Alberta oil sands operations, *Atmospheric Measurement Techniques*, 8, 3745–3765, <https://doi.org/10.5194/amt-8-3745-2015>, 2015.
- 780 Gzyl, G., Janson, E., and Łabaj, P.: Mine Water Discharges in Upper Silesian Coal Basin (Poland), in: *Assessment, Restoration and Reclamation of Mining Influenced Soils*, pp. 463–486, Elsevier, <https://doi.org/10.1016/b978-0-12-809588-1.00017-7>, 2017.

- Hausmann, P., Sussmann, R., and Smale, D.: Contribution of oil and natural gas production to renewed increase in atmospheric methane (2007–2014): top–down estimate from ethane and methane column observations, *Atmospheric Chemistry and Physics*, 16, 3227–3244, <https://doi.org/10.5194/acp-16-3227-2016>, 2016.
- Helmig, D., Rossabi, S., Hueber, J., Tans, P., Montzka, S. A., Masarie, K., Thoning, K., Plass-Duelmer, C., Claude, A., Carpenter, L. J., Lewis, A. C., Punjabi, S., Reimann, S., Vollmer, M. K., Steinbrecher, R., Hannigan, J. W., Emmons, L. K., Mahieu, E., Franco, B., Smale, D., and Pozzer, A.: Reversal of global atmospheric ethane and propane trends largely due to US oil and natural gas production, *Nature Geoscience*, 9, 490–495, <https://doi.org/10.1038/ngeo2721>, 2016.
- Hess, M., Koepke, P., and Schult, I.: Optical properties of aerosols and clouds: The software package OPAC, *Bulletin of the American meteorological society*, 79, 831–844, [https://doi.org/10.1175/1520-0477\(1998\)079<0831:OPOAAC>2.0.CO;2](https://doi.org/10.1175/1520-0477(1998)079<0831:OPOAAC>2.0.CO;2), 1998.
- Jackson, R. B., Saunio, M., Bousquet, P., Canadell, J. G., Poulter, B., Stavert, A. R., Bergamaschi, P., Niwa, Y., Segers, A., and Tsuruta, A.: Increasing anthropogenic methane emissions arise equally from agricultural and fossil fuel sources, *Environmental Research Letters*, 15, 071 002, <https://doi.org/10.1088/1748-9326/ab9ed2>, 2020.
- Janssens-Maenhout, G., Crippa, M., Guizzardi, D., Muntean, M., Schaaf, E., Dentener, F., Bergamaschi, P., Pagliari, V., Olivier, J. G. J., Peters, J. A. H. W., van Aardenne, J. A., Monni, S., Doering, U., Petrescu, A. M. R., Solazzo, E., and Oreggioni, G. D.: EDGAR v4.3.2 Global Atlas of the three major greenhouse gas emissions for the period 1970–2012, *Earth System Science Data*, 11, 959–1002, <https://doi.org/10.5194/essd-11-959-2019>, 2019.
- Klausner, T., Mertens, M., Huntrieser, H., Galkowski, M., Kuhlmann, G., Baumann, R., Fiehn, A., Joeckel, P., Puehl, M., Roiger, A., Helmig, D., and Bruhwiler, L.: Urban greenhouse gas emissions from the Berlin area: A case study using airborne CO<sub>2</sub> and CH<sub>4</sub> in situ observations in summer 2018, *Elem Sci Anth*, 8, <https://doi.org/10.1525/elementa.411>, 2020.
- Kostinek, J., Roiger, A., Davis, K. J., Sweeney, C., DiGangi, J. P., Choi, Y., Baier, B., Hase, F., Groß, J., Eckl, M., Klausner, T., and Butz, A.: Adaptation and performance assessment of a quantum and interband cascade laser spectrometer for simultaneous airborne in situ observation of CH<sub>4</sub>, C<sub>2</sub>H<sub>6</sub>, CO<sub>2</sub>, CO and N<sub>2</sub>O, *Atmospheric Measurement Techniques*, 12, 1767–1783, <https://doi.org/10.5194/amt-12-1767-2019>, 2019.
- Krautwurst, S., Gerilowski, K., Jonsson, H. H., Thompson, D. R., Kolyer, R. W., Iraci, L. T., Thorpe, A. K., Horstjann, M., Eastwood, M., Leifer, I., Vigil, S. A., Krings, T., Borchardt, J., Buchwitz, M., Fladeland, M. M., Burrows, J. P., and Bovensmann, H.: Methane emissions from a Californian landfill, determined from airborne remote sensing and in situ measurements, *Atmospheric Measurement Techniques*, 10, 3429–3452, <https://doi.org/10.5194/amt-10-3429-2017>, 2017.
- Krings, T., Gerilowski, K., Buchwitz, M., Reuter, M., Tretner, A., Erzinger, J., Heinze, D., Pflüger, U., Burrows, J. P., and Bovensmann, H.: MAMAP - a new spectrometer system for column-averaged methane and carbon dioxide observations from aircraft: retrieval algorithm and first inversions for point source emission rates, *Atmospheric Measurement Techniques*, 4, 1735–1758, <https://doi.org/10.5194/amt-4-1735-2011>, 2011.
- Krings, T., Gerilowski, K., Buchwitz, M., Hartmann, J., Sachs, T., Erzinger, J., Burrows, J. P., and Bovensmann, H.: Quantification of methane emission rates from coal mine ventilation shafts using airborne remote sensing data, *Atmospheric Measurement Techniques*, 6, 151–166, <https://doi.org/10.5194/amt-6-151-2013>, 2013.
- Krings, T., Neininger, B., Gerilowski, K., Krautwurst, S., Buchwitz, B., Burrows, J. P., C., L., Ruhtz, T., Schuettmeyer, D., and Bovensmann, H.: Airborne remote sensing and in situ measurements of atmospheric CO<sub>2</sub> to quantify point source emissions, *Atmospheric Measurement Techniques*, 11, 721–739, <https://doi.org/10.5194/amt-11-721-2018>, 2018.

- Lavoie, T. N., Shepson, P. B., Cambaliza, M. O. L., Stirm, B. H., Karion, A., Sweeney, C., Yacovitch, T. I., Herndon, S. C., Lan, X., and Lyon, D.: Aircraft-Based Measurements of Point Source Methane Emissions in the Barnett Shale Basin, *Environmental Science & Technology*, 49, 7904–7913, <https://doi.org/10.1021/acs.est.5b00410>, 2015.
- 825 Luther, A., Kleinschek, R., Scheidweiler, L., Defratyka, S., Stanisavljevic, M., Forstmaier, A., Dandocsi, A., Wolff, S., Dubravica, D., Wildmann, N., Kostinek, J., Joeckel, P., Nickl, A.-L., Klausner, T., Hase, F., Frey, M., Chen, J., Dietrich, F., Necki, J., Swolkien, J., Fix, A., Roiger, A., and Butz, A.: Quantifying CH<sub>4</sub> emissions from hard coal mines using mobile sun-viewing Fourier transform spectrometry, *Atmospheric Measurement Techniques*, 12, 5217–5230, <https://doi.org/10.5194/amt-12-5217-2019>, 2019.
- 830 Maasackers, J. D., Jacob, D. J., Sulprizio, M. P., Turner, A. J., Weitz, M., Wirth, T., Hight, C., DeFigueiredo, M., Desai, M., Schmeltz, R., Hockstad, L., Bloom, A. A., Bowman, K. W., Jeong, S., and Fischer, M. L.: Gridded National Inventory of U.S. Methane Emissions, *Environmental Science & Technology*, <https://doi.org/10.1021/acs.est.6b02878>, 2016.
- Matheou, G. and Bowman, K. W.: A recycling method for the large-eddy simulation of plumes in the atmospheric boundary layer, *Environmental Fluid Mechanics*, 16, 69–85, <https://doi.org/10.1007/s10652-015-9413-4>, 2016.
- 835 Myhre, G., Shindell, D., Breon, F.-M., Collins, W., Fuglestedt, J., Huang, J., Koch, D., Lamarque, J.-F., Lee, D., Mendoza, B., Nakajima, T., Robock, A., Stephens, G., Takemura, T., and Zhang, H.: Anthropogenic and Natural Radiative Forcing, book section 8, pp. 659–740, Cambridge University Press, Cambridge, United Kingdom and New York, NY, USA, <https://doi.org/10.1017/CBO9781107415324.018>, 2013.
- 840 Nickl, A.-L., Mertens, M., Roiger, A., Fix, A., Amediek, A., Fiehn, A., Gerbig, C., Galkowski, M., Kerkweg, A., Klausner, T., Eckl, M., and Joeckel, P.: Hindcasting and forecasting of regional methane from coal mine emissions in the Upper Silesian Coal Basin using the online nested global regional chemistry - climate model MECO(n) (MESSy v2.53), *Geoscientific Model Development*, 13, 1925–1943, <https://doi.org/10.5194/gmd-13-1925-2020>, 2020.
- Nisbet, E. G., Dlugokencky, E. J., Manning, M. R., Lowry, D., Fisher, R. E., France, J. L., Michel, S. E., Miller, J. B., White, J. W. C., Vaughn, B., Bousquet, P., Pyle, J. A., Warwick, N. J., Cain, M., Brownlow, R., Zazzeri, G., Lanoisellé, M., Manning, A. C., Gloor, E., Worthy, D. E. J., Brunke, E.-G., Labuschagne, C., Wolff, E. W., and Ganesan, A. L.: Rising atmospheric methane: 2007–2014 growth and isotopic shift, *Global Biogeochemical Cycles*, 30, 1356–1370, <https://doi.org/10.1002/2016gb005406>, 2016.
- 845 Peischl, J., Karion, A., Sweeney, C., Kort, E. A., Smith, M. L., Brandt, A. R., Yeskoo, T., Aikin, K. C., Conley, S. A., Gvakharia, A., Trainer, M., Wolter, S., and Ryerson, T. B.: Quantifying atmospheric methane emissions from oil and natural gas production in the Bakken shale region of North Dakota, *Journal of Geophysical Research: Atmospheres*, 121, 6101–6111, <https://doi.org/10.1002/2015jd024631>, 2016.
- 850 Peischl, J., Eilerman, S. J., Neuman, J. A., Aikin, K. C., de Gouw, J., Gilman, J. B., Herndon, S. C., Nadkarni, R., Trainer, M., Warneke, C., and Ryerson, T. B.: Quantifying Methane and Ethane Emissions to the Atmosphere From Central and Western U.S. Oil and Natural Gas Production Regions, *Journal of Geophysical Research: Atmospheres*, <https://doi.org/10.1029/2018jd028622>, 2018.
- Petrenko, V. V., Smith, A. M., Schaefer, H., Riedel, K., Brook, E., Bagginstos, D., Harth, C., Hua, Q., Buizert, C., Schilt, A., Fain, X., Mitchell, L., Bauska, T., Orsi, A., Weiss, R. F., and Severinghaus, J. P.: Minimal geological methane emissions during the Younger Dryas–Preboreal abrupt warming event, *Nature*, 548, 443–446, <https://doi.org/10.1038/nature23316>, 2017.
- 855 Pitt, J. R., Allen, G., Bauguutte, S. J.-B., Gallagher, M. W., Lee, J. D., Drysdale, W., Nelson, B., Manning, A. J., and Palmer, P. I.: Assessing London CO<sub>2</sub>, CH<sub>4</sub> and CO emissions using aircraft measurements and dispersion modelling, *Atmospheric Chemistry and Physics*, 19, 8931–8945, <https://doi.org/10.5194/acp-19-8931-2019>, 2019.

- Prather, M. J., Holmes, C. D., and Hsu, J.: Reactive greenhouse gas scenarios: Systematic exploration of uncertainties and the role of atmospheric chemistry, *Geophysical Research Letters*, 39, <https://doi.org/10.1029/2012gl051440>, <https://doi.org/10.1029%2F2012gl051440>, 2012.
- 860 Quatrevalet, M., Amediek, A., Fix, A., Kiemle, C., Wirth, M., Büdenbender, C., Schweyer, S., Ehret, G., Hoffmann, D., Meissner, A., Löhring, J., and Luttmann, J. C.: CHARM-F: The Airborne Integral Path Differential Absorption Lidar for Simultaneous Measurements of Atmospheric CO<sub>2</sub> and CH<sub>4</sub>, in: *25th International Laser Radar Conference (ILRC 25)*, 2010.
- Ren, X., Hall, D. L., Vinciguerra, T., Benish, S. E., Stratton, P. R., Ahn, D., Hansford, J. R., Cohen, M. D., Sahu, S., He, H., Grimes, C., Fuentes, J. D., Shepson, P. B., Salawitch, R. J., Ehrman, S. H., and Dickerson, R. R.: Methane Emissions from the Marcellus Shale  
865 in Southwestern Pennsylvania and Northern West Virginia Based on Airborne Measurements, *Journal of Geophysical Research: Atmospheres*, 124, 1862–1878, <https://doi.org/10.1029/2018jd029690>, 2019.
- Reuter, M., Buchwitz, M., Schneising, O., Krautwurst, S., ODell, C. W., Richter, A., Bovensmann, H., and Burrows, J. P.: Towards monitoring localized CO<sub>2</sub> emissions from space: co-located regional CO<sub>2</sub> and NO<sub>2</sub> enhancements observed by the OCO-2 and SSP satellites, *Atmospheric Chemistry and Physics*, 19, 9371–9383, <https://doi.org/10.5194/acp-19-9371-2019>, 2019.
- 870 Rigby, M., Montzka, S. A., Prinn, R. G., White, J. W. C., Young, D., ODoherty, S., Lunt, M. F., Ganesan, A. L., Manning, A. J., Simmonds, P. G., Salameh, P. K., Harth, C. M., Muehle, J., Weiss, R. F., Fraser, P. J., Steele, L. P., Krummel, P. B., McCulloch, A., and Park, S.: Role of atmospheric oxidation in recent methane growth, *Proceedings of the National Academy of Sciences*, 114, 5373–5377, <https://doi.org/10.1073/pnas.1616426114>, 2017.
- Rozanov, V., Rozanov, A., Kokhanovsky, A., and Burrows, J.: Radiative transfer through terrestrial atmosphere and ocean: Software package  
875 SCIATRAN, *Journal of Quantitative Spectroscopy and Radiative Transfer*, 133, 13 – 71, <https://doi.org/10.1016/j.jqsrt.2013.07.004>, 2014.
- Saunois, M., Bousquet, P., Poulter, B., Peregón, A., Ciais, P., Canadell, J. G., Dlugokencky, E. J., Etiope, G., Bastviken, D., Houweling, S., Janssens-Maenhout, G., Tubiello, F. N., Castaldi, S., Jackson, R. B., Alexe, M., Arora, V. K., Beerling, D. J., Bergamaschi, P., Blake, D. R., Brailsford, G., Brovkin, V., Bruhwiler, L., Crevoisier, C., Crill, P., Covey, K., Curry, C., Frankenberg, C., Gedney, N., Hoeglund-Isaksson, L., Ishizawa, M., Ito, A., Joos, F., Kim, H.-S., Kleinen, T., Krummel, P., Lamarque, J.-F., Langenfelds, R., Locatelli, R., Machida, T.,  
880 Maksyutov, S., McDonald, K. C., Marshall, J., Melton, J. R., Morino, I., Naik, V., O’Doherty, S., Parmentier, F.-J. W., Patra, P. K., Peng, C., Peng, S., Peters, G. P., Pison, I., Prigent, C., Prinn, R., Ramonet, M., Riley, W. J., Saito, M., Santini, M., Schroeder, R., Simpson, I. J., Spahni, R., Steele, P., Takizawa, A., Thornton, B. F., Tian, H., Tohjima, Y., Viovy, N., Voulgarakis, A., van Weele, M., van der Werf, G. R., Weiss, R., Wiedinmyer, C., Wilton, D. J., Wiltshire, A., Worthy, D., Wunch, D., Xu, X., Yoshida, Y., Zhang, B., Zhang, Z., and Zhu, Q.: The global methane budget 2000 - 2012, *Earth System Science Data*, 8, 697–751, <https://doi.org/10.5194/essd-8-697-2016>, 2016.
- 885 Saunois, M., Stavert, A. R., Poulter, B., Bousquet, P., Canadell, J. G., Jackson, R. B., Raymond, P. A., Dlugokencky, E. J., Houweling, S., Patra, P. K., Ciais, P., Arora, V. K., Bastviken, D., Bergamaschi, P., Blake, D. R., Brailsford, G., Bruhwiler, L., Carlson, K. M., Carrol, M., Castaldi, S., Chandra, N., Crevoisier, C., Crill, P. M., Covey, K., Curry, C. L., Etiope, G., Frankenberg, C., Gedney, N., Hegglin, M. I., Hoeglund-Isaksson, L., Hugelius, G., Ishizawa, M., Ito, A., Janssens-Maenhout, G., Jensen, K. M., Joos, F., Kleinen, T., Krummel, P. B., Langenfelds, R. L., Laruelle, G. G., Liu, L., Machida, T., Maksyutov, S., McDonald, K. C., McNorton, J., Miller, P. A., Melton,  
890 J. R., Morino, I., Mueller, J., Murguía-Flores, F., Naik, V., Niwa, Y., Noce, S., ODoherty, S., Parker, R. J., Peng, C., Peng, S., Peters, G. P., Prigent, C., Prinn, R., Ramonet, M., Regnier, P., Riley, W. J., Rosentretter, J. A., Segers, A., Simpson, I. J., Shi, H., Smith, S. J., Steele, L. P., Thornton, B. F., Tian, H., Tohjima, Y., Tubiello, F. N., Tsuruta, A., Viovy, N., Voulgarakis, A., Weber, T. S., van Weele, M., van der Werf, G. R., Weiss, R. F., Worthy, D., Wunch, D., Yin, Y., Yoshida, Y., Zhang, W., Zhang, Z., Zhao, Y., Zheng, B., Zhu, Q., Zhu, Q., and Zhuang,

- 895 Q.: The Global Methane Budget 2000–2017, *Earth System Science Data*, 12, 1561–1623, <https://doi.org/10.5194/essd-12-1561-2020>, 2020.
- Scarpelli, T. R., Jacob, D. J., Maasackers, J. D., Sulprizio, M. P., Sheng, J.-X., Rose, K., Romeo, L., Worden, J. R., and Janssens-Maenhout, G.: A global gridded (0.1 deg x 0.1 deg) inventory of methane emissions from oil, gas, and coal exploitation based on national reports to the United Nations Framework Convention on Climate Change, *Earth System Science Data*, 12, 563–575, <https://doi.org/10.5194/essd-12-563-2020>, 2020.
- 900 Schaefer, H., Fletcher, S. E. M., Veidt, C., Lassey, K. R., Brailsford, G. W., Bromley, T. M., Dlugokencky, E. J., Michel, S. E., Miller, J. B., Levin, I., Lowe, D. C., Martin, R. J., Vaughn, B. H., and White, J. W. C.: A 21st-century shift from fossil-fuel to biogenic methane emissions indicated by 13CH<sub>4</sub>, *Science*, 352, 80–84, <https://doi.org/10.1126/science.aad2705>, 2016.
- Schneising, O., Buchwitz, M., Burrows, J. P., Bovensmann, H., Bergamaschi, P., and Peters, W.: Three years of greenhouse gas column-averaged dry air mole fractions retrieved from satellite - Part 2: Methane, *Atmos. Chem. Phys.*, 9, 443–465, <https://doi.org/10.5194/acp-9-443-2009>, 2009.
- 905 Schwiethzke, S., Sherwood, O. A., Bruhwiler, L. M. P., Miller, J. B., Etiope, G., Dlugokencky, E. J., Michel, S. E., Arling, V. A., Vaughn, B. H., White, J. W. C., and Tans, P. P.: Upward revision of global fossil fuel methane emissions based on isotope database, *Nature*, 538, 88–91, <https://doi.org/10.1038/nature19797>, 2016.
- Sharan, M., Yadav, A. K., Singh, M., Agarwal, P., and Nigam, S.: A mathematical model for the dispersion of air pollutants in low wind conditions, *Atmospheric Environment*, 30, 1209–1220, [https://doi.org/10.1016/1352-2310\(95\)00442-4](https://doi.org/10.1016/1352-2310(95)00442-4), 1996.
- 910 Shindell, D., Kuylenstierna, J. C. I., Vignati, E., van Dingenen, R., Amann, M., Klimont, Z., Anenberg, S. C., Muller, N., Janssens-Maenhout, G., Raes, F., Schwartz, J., Faluvegi, G., Pozzoli, L., Kupiainen, K., Hoeglund-Isaksson, L., Emberson, L., Streets, D., Ramanathan, V., Hicks, K., Oanh, N. T. K., Milly, G., Williams, M., Demkine, V., and Fowler, D.: Simultaneously Mitigating Near-Term Climate Change and Improving Human Health and Food Security, *Science*, 335, 183–189, <https://doi.org/10.1126/science.1210026>, 2012.
- 915 Smalikho, I.: Techniques of Wind Vector Estimation from Data Measured with a Scanning Coherent Doppler Lidar, *Journal of Atmospheric and Oceanic Technology*, 20, 276–291, [https://doi.org/10.1175/1520-0426\(2003\)020<0276:towvfe>2.0.co;2](https://doi.org/10.1175/1520-0426(2003)020<0276:towvfe>2.0.co;2), 2003.
- Smalikho, I. N. and Banakh, V. A.: Measurements of wind turbulence parameters by a conically scanning coherent Doppler lidar in the atmospheric boundary layer, *Atmospheric Measurement Techniques*, 10, 4191–4208, <https://doi.org/10.5194/amt-10-4191-2017>, 2017.
- Stephan, A., Smalikho, I. N., and Wildmann, N.: Effectiveness of the MFAS method for retrieval of height profiles of speed and direction of the wind from measurements by a Windcube 200s lidar, in: 24th International Symposium on Atmospheric and Ocean Optics: Atmospheric Physics, edited by Romanovskii, O. A. and Matvienko, G. G., SPIE, <https://doi.org/10.1117/12.2504450>, 2018a.
- 920 Stephan, A., Smalikho, I. N., and Wildmann, N.: Spatiotemporal visualization of wind turbulence from measurements by a Windcube 200s lidar in the atmospheric boundary layer, in: 24th International Symposium on Atmospheric and Ocean Optics: Atmospheric Physics, edited by Romanovskii, O. A. and Matvienko, G. G., SPIE, <https://doi.org/10.1117/12.2504468>, 2018b.
- 925 Stocker, T., Qin, D., Plattner, G.-K., Alexander, L., Allen, S., Bindoff, N., Breon, F.-M., Church, J., Cubasch, U., Emori, S., Forster, P., Friedlingstein, P., Gillett, N., Gregory, J., Hartmann, D., Jansen, E., Kirtman, B., Knutti, R., Krishna Kumar, K., Lemke, P., Marotzke, J., Masson-Delmotte, V., Meehl, G., Mokhov, I., Piao, S., Ramaswamy, V., Randall, D., Rhein, M., Rojas, M., Sabine, C., Shindell, D., Talley, L., Vaughan, D., and Xie, S.-P.: Technical Summary, book section TS, pp. 33–115, Cambridge University Press, Cambridge, United Kingdom and New York, NY, USA, <https://doi.org/10.1017/CBO9781107415324.005>, 2013.
- 930 Swolkien, J., Fix, A., and Galkowski, M.: Factors that influence the temporal variability of atmospheric methane emission from Upper Silesia coal mines: A case study from CoMet mission, in preparation, 2021.

- Thorpe, A. K., Frankenberg, C., Aubrey, A. D., Roberts, D. A., Nottrott, A. A., Rahn, T. A., Sauer, J. A., Dubey, M. K., Costigan, K. R., Arata, C., Steffke, A. M., Hills, S., Haselwimmer, C., Charlesworth, D., Funk, C. C., Green, R. O., Lundeen, S. R., Boardman, J. W., Eastwood, M. L., Sarture, C. M., Nolte, S. H., Mccubbin, I. B., Thompson, D. R., and McFadden, J. P.: Mapping methane concentrations from a controlled release experiment using the next generation airborne visible/infrared imaging spectrometer (AVIRIS-NG), *Remote Sensing of Environment*, 179, 104 – 115, <https://doi.org/http://dx.doi.org/10.1016/j.rse.2016.03.032>, 2016.
- 935 Thorpe, A. K., Frankenberg, C., Thompson, D. R., Duren, R. M., Aubrey, A. D., Bue, B. D., Green, R. O., Gerilowski, K., Krings, T., Borchardt, J., Kort, E. A., Sweeney, C., Conley, S., Roberts, D. A., and Dennison, P. E.: Airborne DOAS retrievals of methane, carbon dioxide, and water vapor concentrations at high spatial resolution: application to AVIRIS-NG, *Atmospheric Measurement Techniques*, 10, 3833–3850, <https://doi.org/10.5194/amt-10-3833-2017>, 2017.
- 940 Tratt, D. M., Buckland, K. N., Hall, J. L., Johnson, P. D., Keim, E. R., Leifer, I., Westberg, K., and Young, S. J.: Airborne visualization and quantification of discrete methane sources in the environment, *Remote Sensing of Environment*, 154, 74 – 88, <https://doi.org/10.1016/j.rse.2014.08.011>, 2014.
- Turnbull, J. C., Karion, A., Fischer, M. L., Faloona, I., Guilderson, T., Lehman, S. J., Miller, B. R., Miller, J. B., Montzka, S., Sherwood, T., Saripalli, S., Sweeney, C., and Tans, P. P.: Assessment of fossil fuel carbon dioxide and other anthropogenic trace gas emissions from airborne measurements over Sacramento, California in spring 2009, *Atmospheric Chemistry and Physics*, 11, 705–721, <https://doi.org/10.5194/acp-11-705-2011>, 1, 2011.
- 945 Turner, A. J., Jacob, D. J., Wecht, K. J., Maasackers, J. D., Lundgren, E., Andrews, A. E., Biraud, S. C., Boesch, H., Bowman, K. W., Deutscher, N. M., Dubey, M. K., Griffith, D. W. T., Hase, F., Kuze, A., Notholt, J., Ohyama, H., Parker, R., Payne, V. H., Sussmann, R., Sweeney, C., Velazco, V. A., Warneke, T., Wennberg, P. O., and Wunch, D.: Estimating global and North American methane emissions with high spatial resolution using GOSAT satellite data, *Atmospheric Chemistry and Physics*, 15, 7049–7069, <https://doi.org/10.5194/acp-15-7049-2015>, 2015.
- 950 Turner, A. J., Jacob, D. J., Benmergui, J., Wofsy, S. C., Maasackers, J. D., Butz, A., Hasekamp, O., and Biraud, S. C.: A large increase in U.S. methane emissions over the past decade inferred from satellite data and surface observations, *Geophysical Research Letters*, 43, 2218–2224, <https://doi.org/10.1002/2016gl067987>, 2016.
- Turner, A. J., Frankenberg, C., Wennberg, P. O., and Jacob, D. J.: Ambiguity in the causes for decadal trends in atmospheric methane and hydroxyl, *Proceedings of the National Academy of Sciences*, 114, 5367–5372, <https://doi.org/10.1073/pnas.1616020114>, 2017.
- UNFCCC: United Nations Framework Convention on Climate Change: Kyoto Protocol to the United Nations Framework Convention on Climate Change, available at [http://unfccc.int/kyoto\\_protocol/items/2830.php](http://unfccc.int/kyoto_protocol/items/2830.php), last access: 07.11.2017, 1998.
- 960 UNFCCC: United Nations Framework Convention on Climate Change: The Paris Agreement, COP21 (Decision: 1/CP.21), available at [http://unfccc.int/paris\\_agreement/items/9485.php](http://unfccc.int/paris_agreement/items/9485.php), last access: 07.02.2017, 2015.
- USCESA: United States Committee on Extension to the Standard Atmosphere: U.S. standard atmosphere, 1976, National Oceanic and Atmospheric Administration, National Aeronautics and Space Administration, United States Air Force, 1976.
- White, W., Anderson, J., Blumenthal, D., Husar, R., Gillani, N., Husar, J., and Wilson, W.: Formation and transport of secondary air pollutants: ozone and aerosols in the St. Louis urban plume, *Science*, 194, 187–189, <https://doi.org/10.1126/science.959846>, 1976.
- 965 Wildmann, N., Päschke, E., Roiger, A., and Mallaun, C.: Towards improved turbulence estimation with Doppler wind lidar velocity-azimuth display (VAD) scans, *Atmospheric Measurement Techniques*, 13, 4141–4158, <https://doi.org/10.5194/amt-13-4141-2020>, 2020.
- Wolff, S., Ehret, G., Kiemle, C., Amediek, A., Quatrevalet, M., Wirth, M., and Fix, A.: Determination of the emission rates of CO<sub>2</sub> point sources with airborne lidar, *Atmospheric Measurement Techniques*, 14, 2717–2736, <https://doi.org/10.5194/amt-14-2717-2021>, 2021.
